# Supplementary material for: Nuts and Cardio-Metabolic Disease: A Review of Meta-Analyses
Source: MDPI journal article supplement (doi:10.3390/nu10121935), 2018-12-06

## Supplementary Materials

### Supplementary Figure 1. Total nuts and all-cause mortality, high vs. low analysis

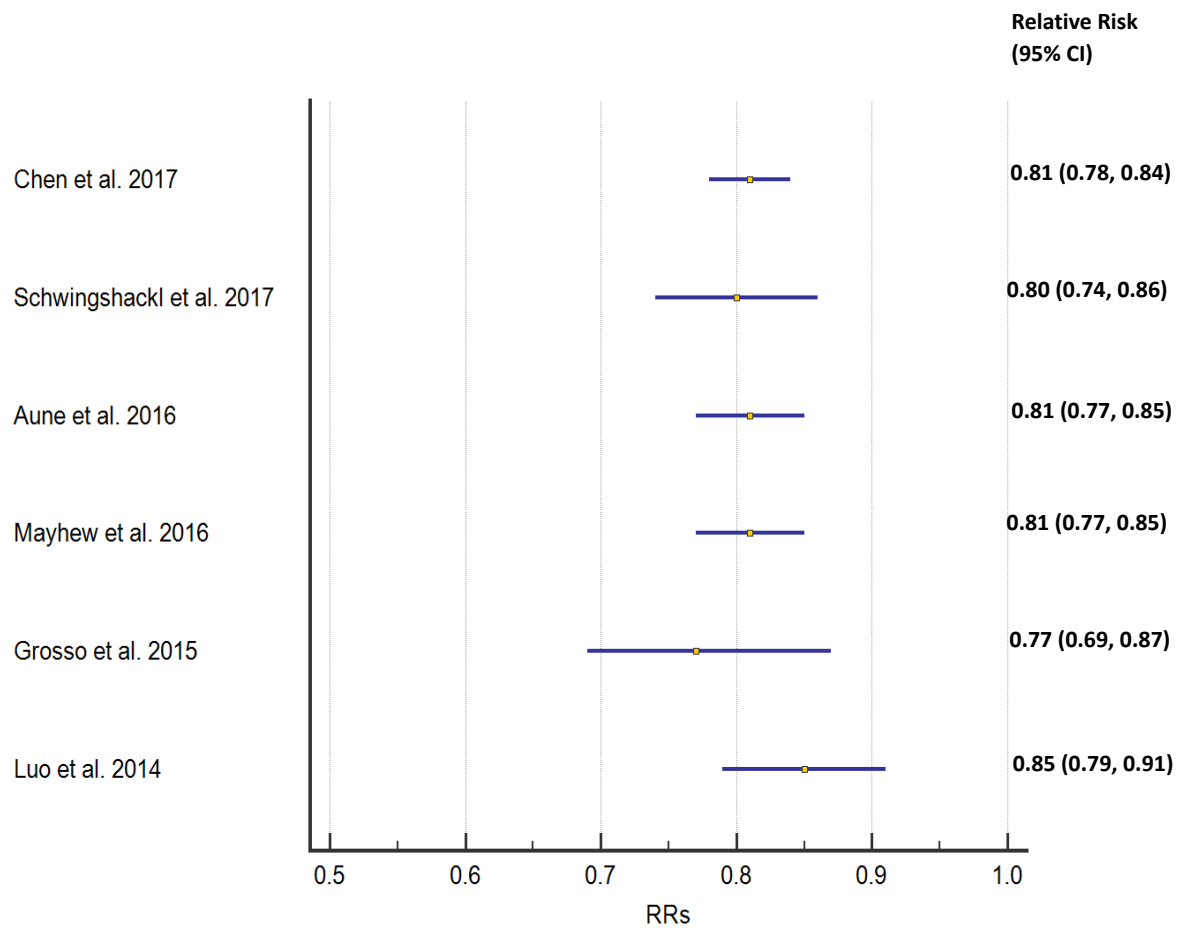

Supplementary Figure 2. Total nuts and all-cause mortality, dose-response analysis

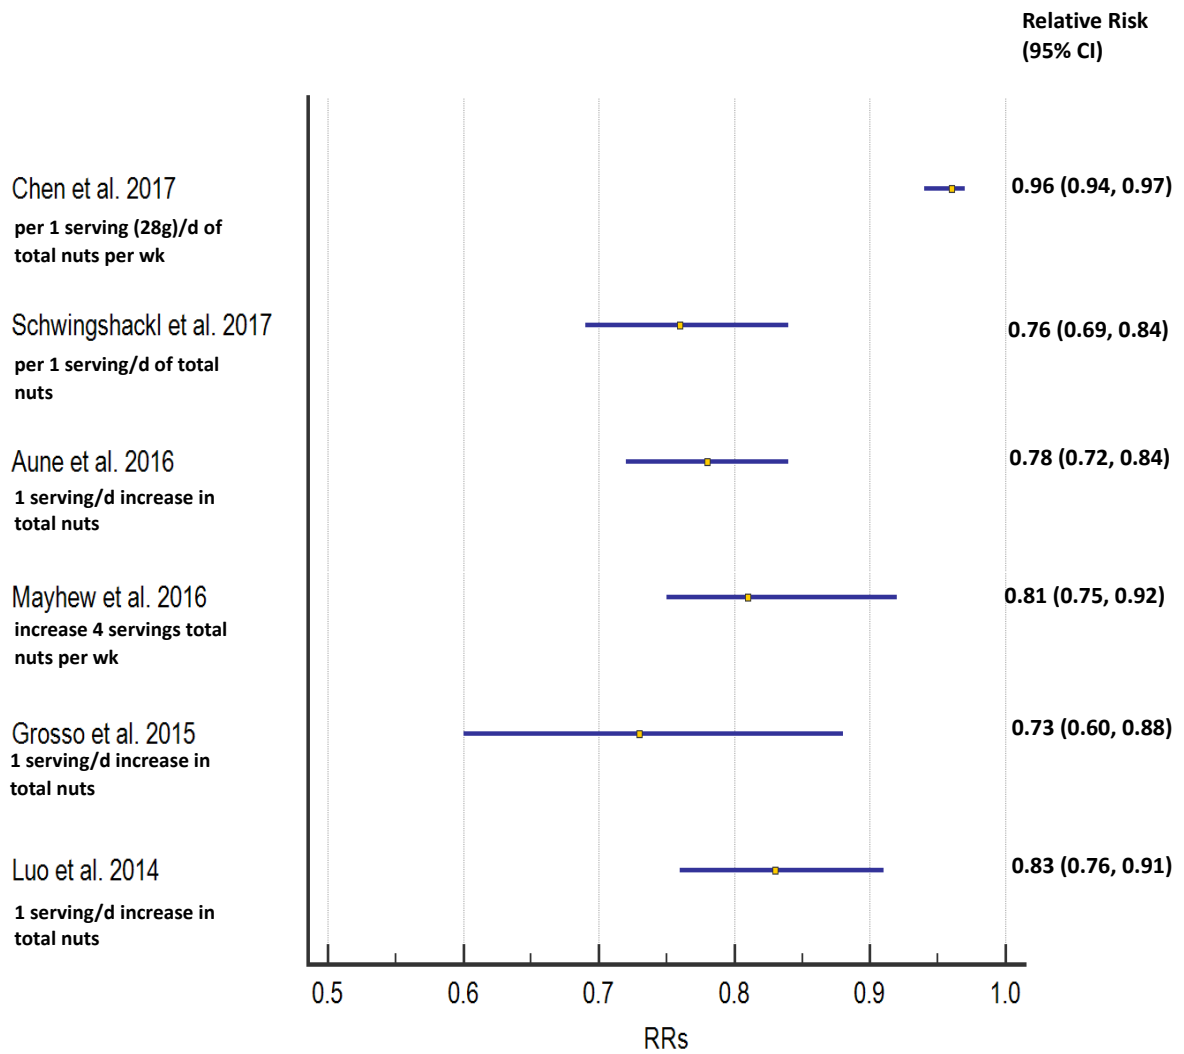

Supplementary Figure 3. Peanuts and all-cause mortality, high vs. low analysis

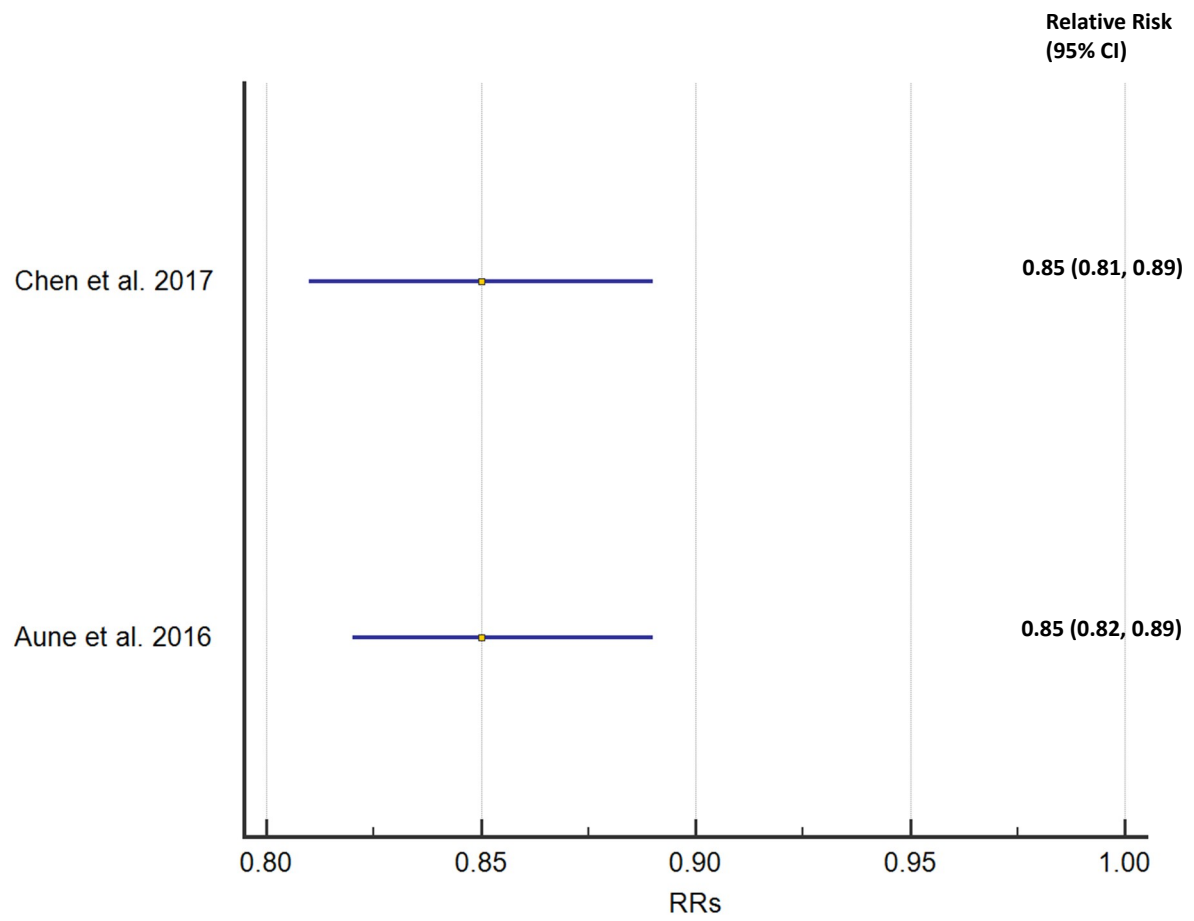

Supplementary Figure 4. Tree nuts and all-cause mortality, high vs. low analysis

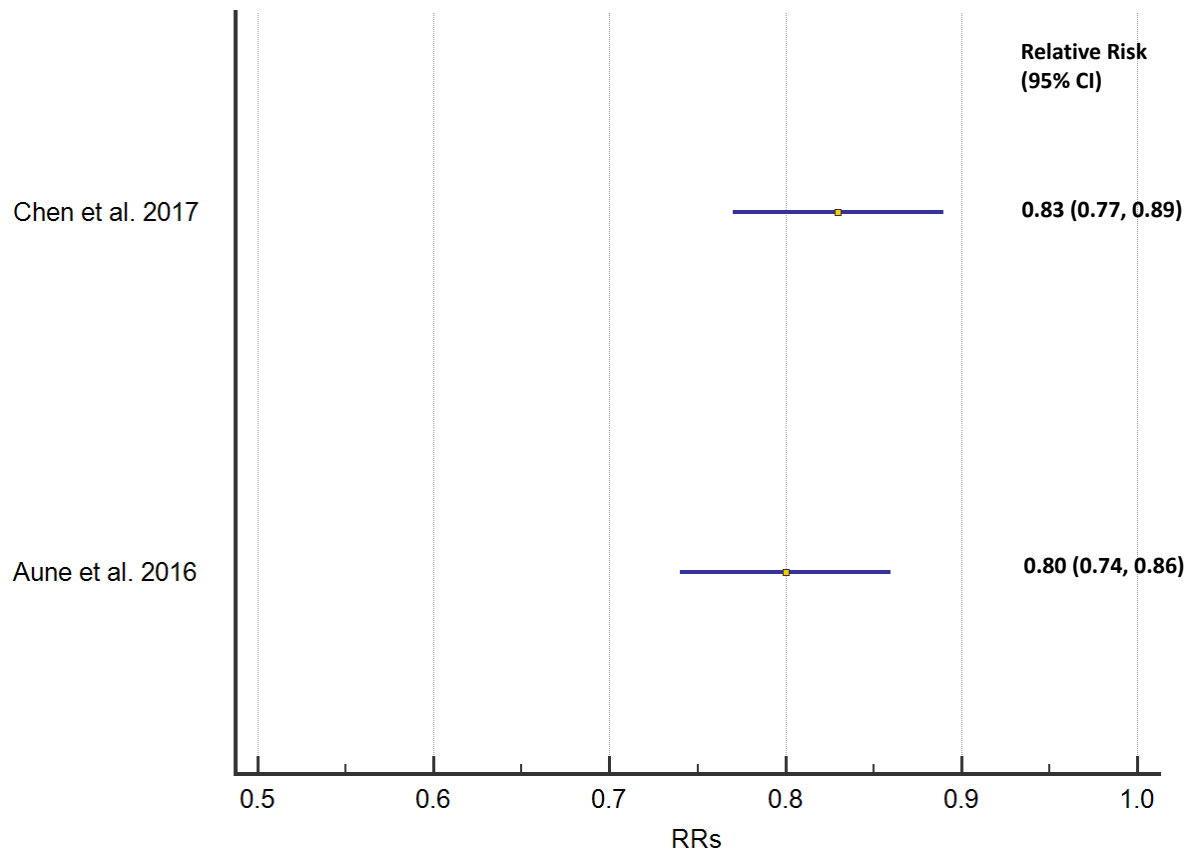

Supplementary Figure 5. Total nuts and coronary heart disease mortality, high vs. low analysis

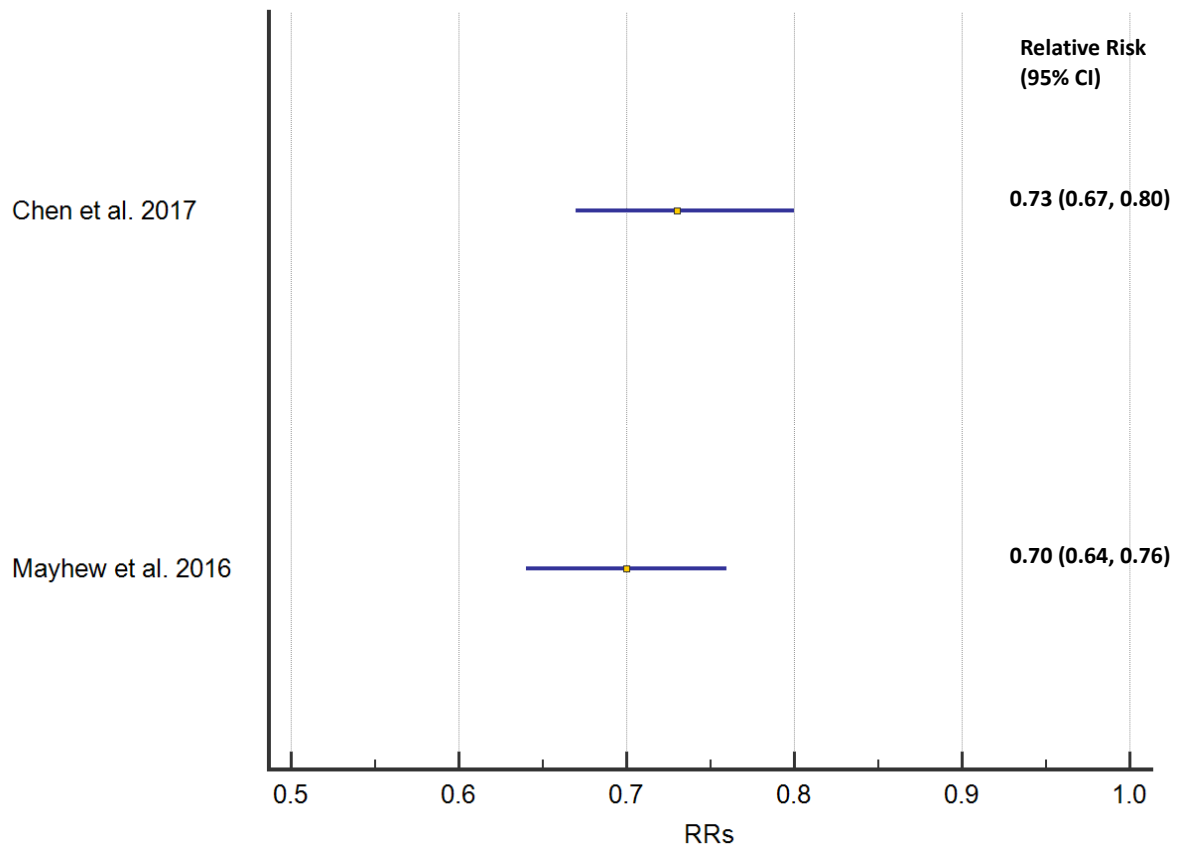

**Supplementary Figure 6. Total nuts and coronary heart disease mortality, dose-response analysis**

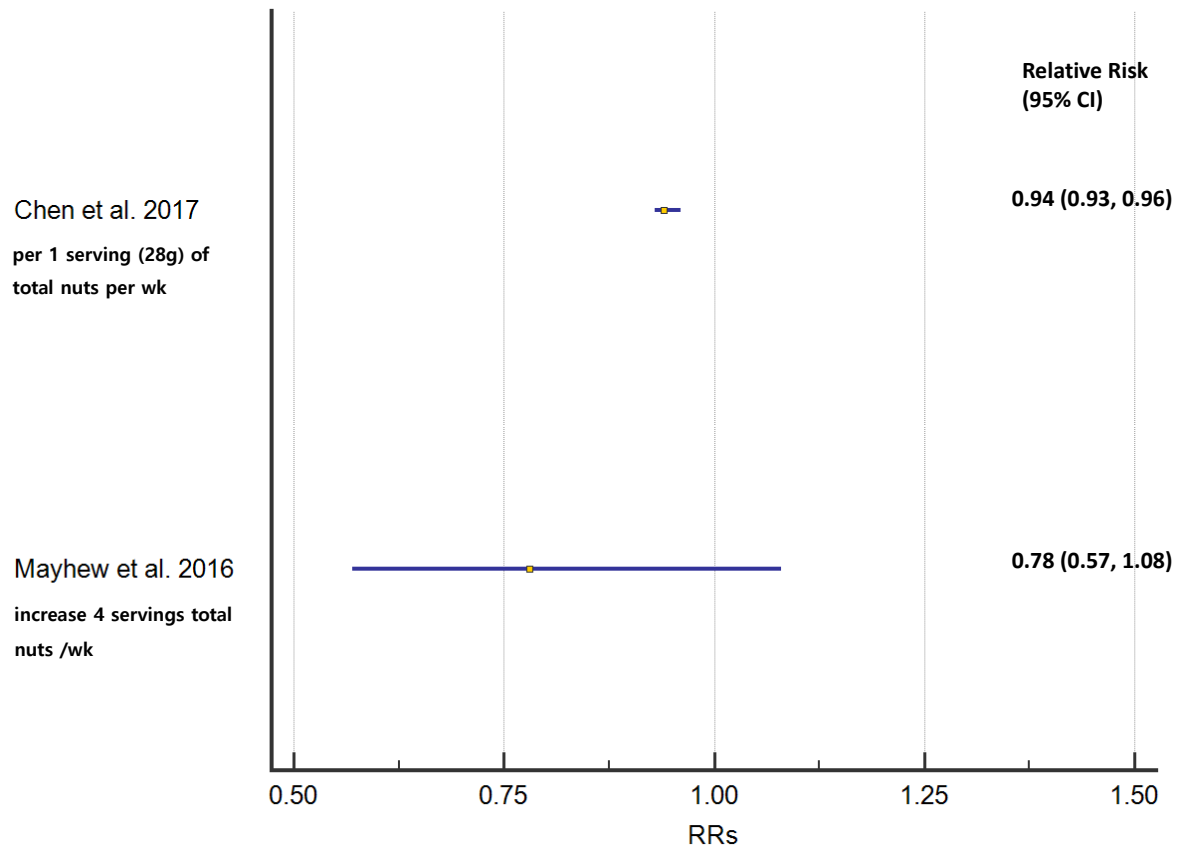

Supplementary Figure 7. Total nuts and cardiovascular disease mortality, high vs. low analysis

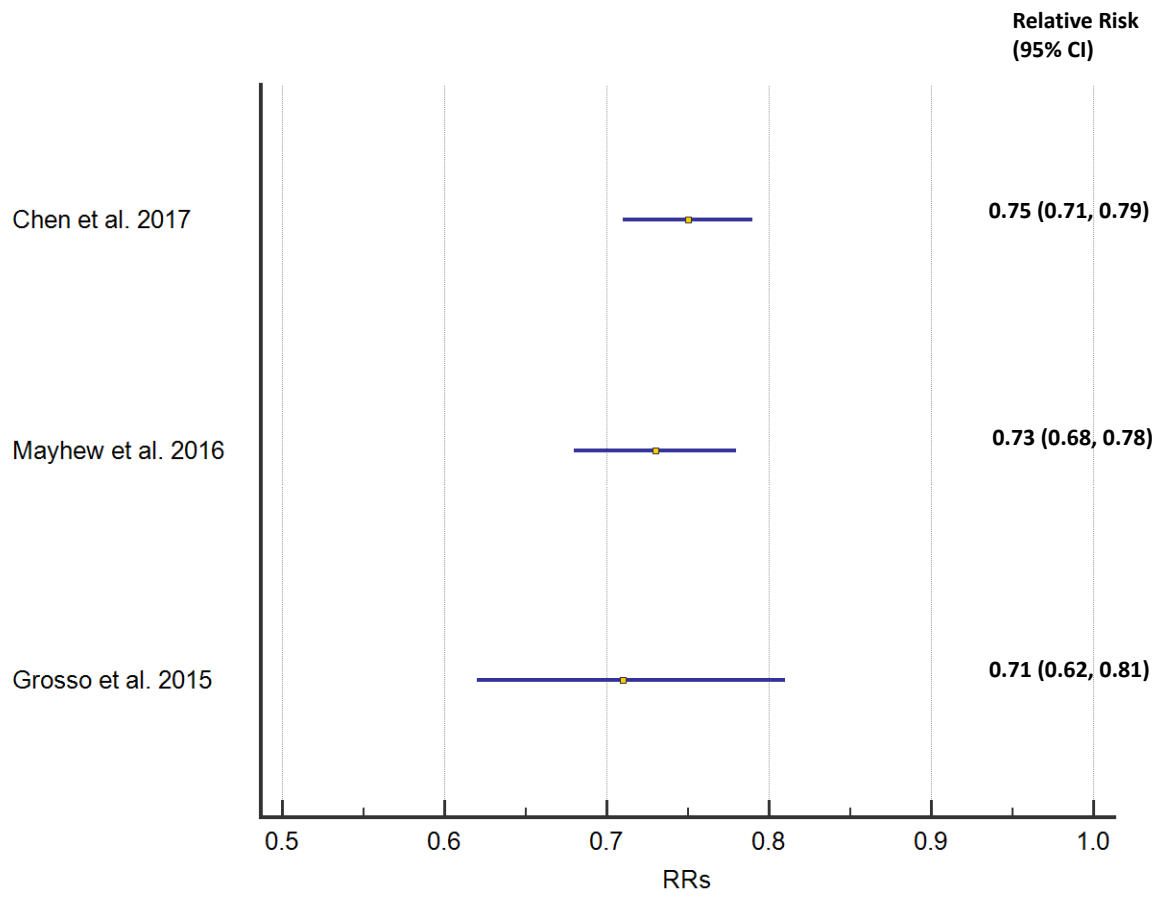

**Supplementary Figure 8. Total nuts and cardiovascular disease mortality, dose-response analysis**

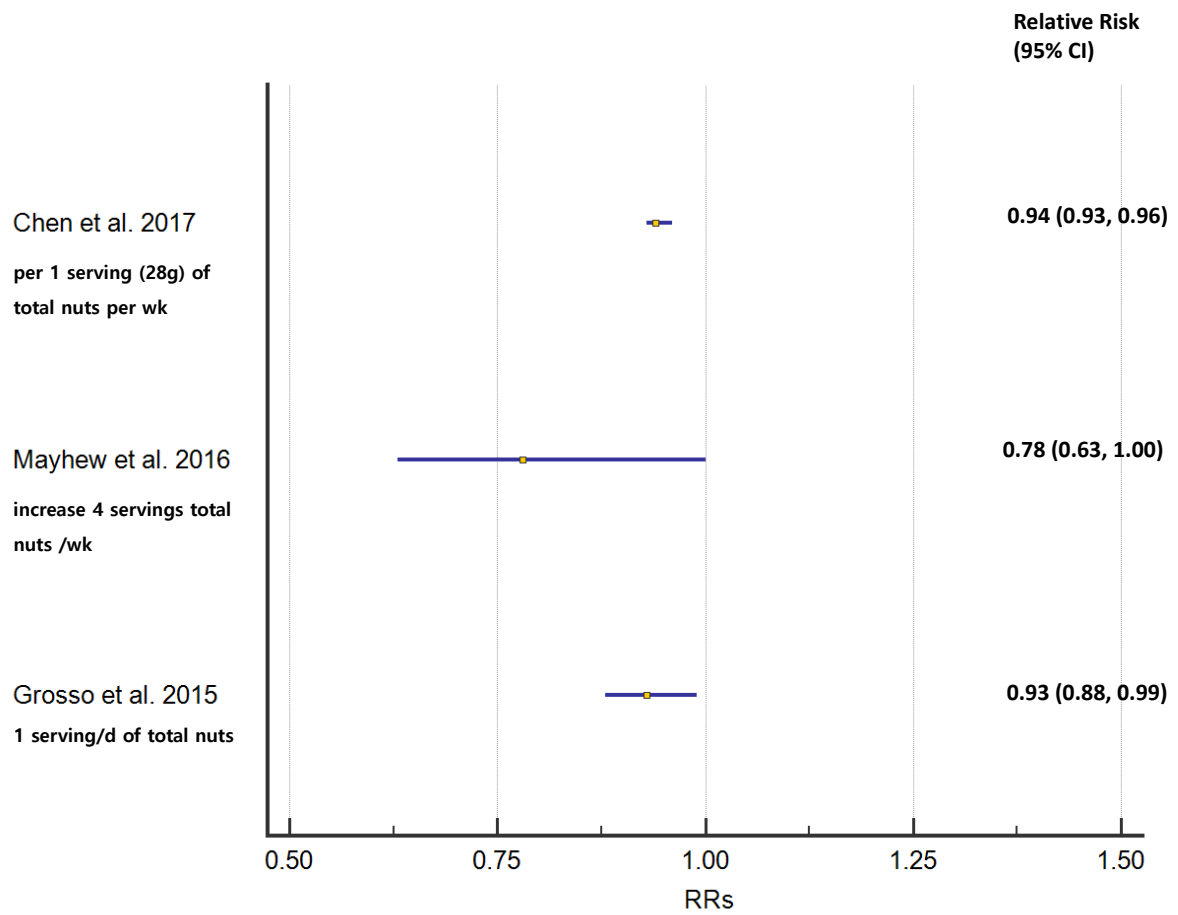



Supplementary Figure 9. Total nuts and stroke mortality, high vs. low analysis

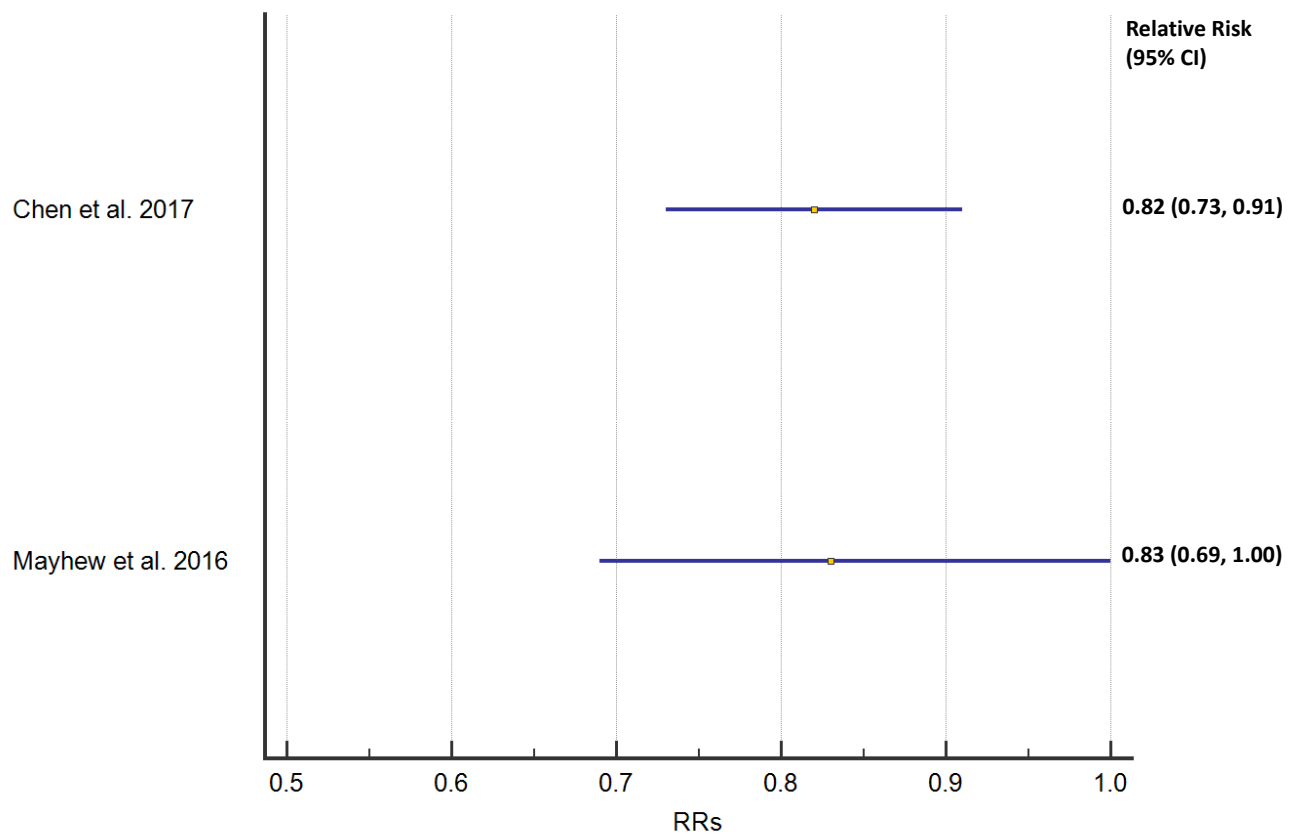

Supplementary Figure 10. Total nuts and stroke mortality, dose-response analysis

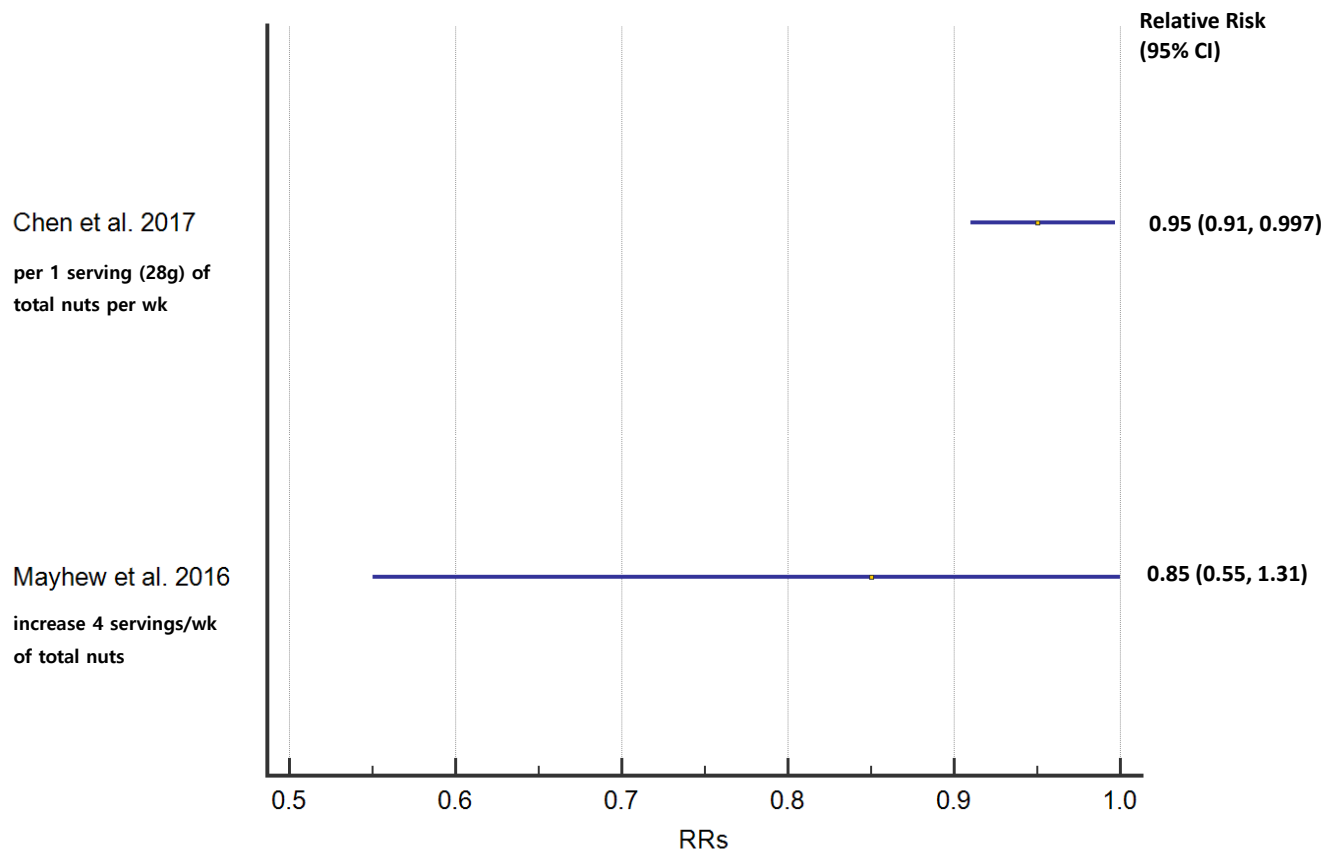

Supplementary Figure 11. Total nuts and type 2 diabetes, high vs. low analysis

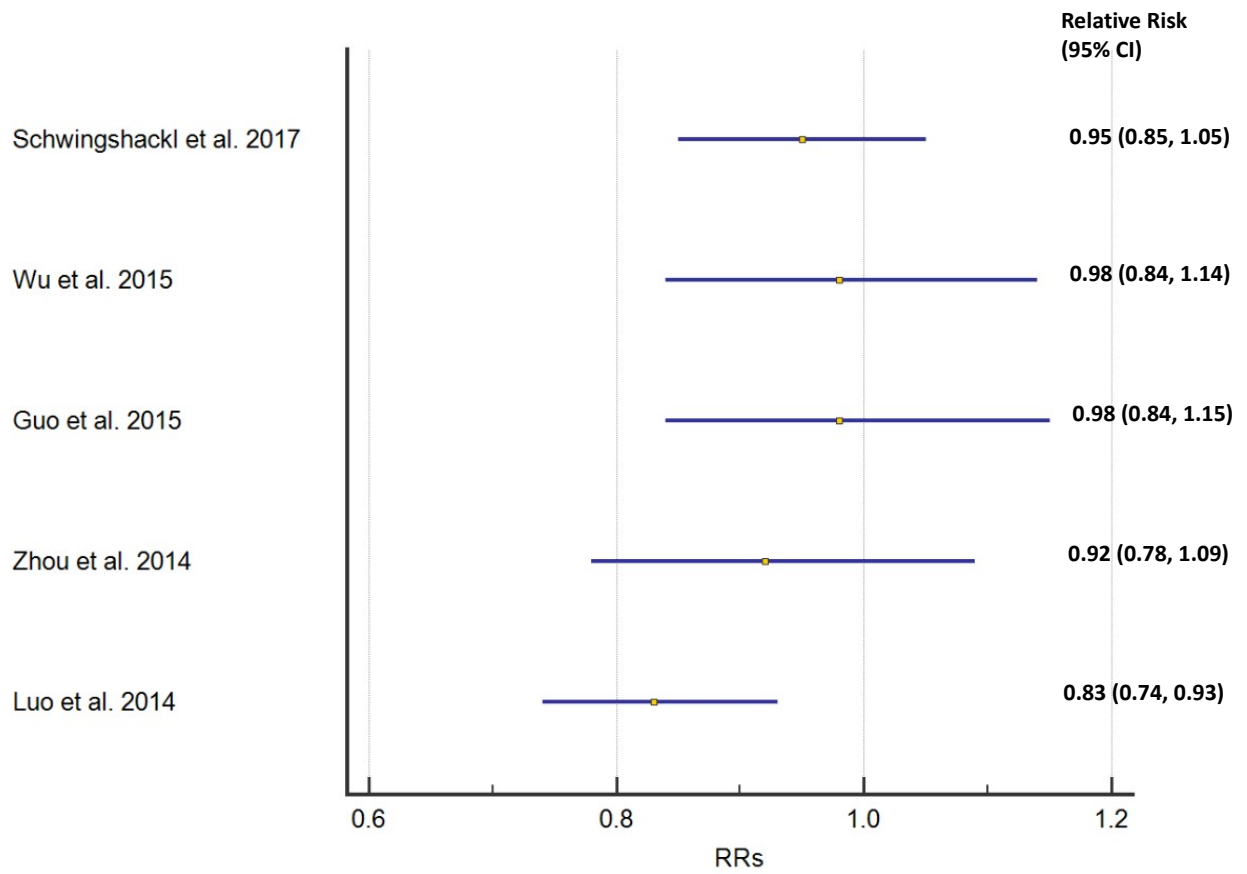

Supplementary Figure 12. Total nuts and type 2 diabetes, dose-response analysis

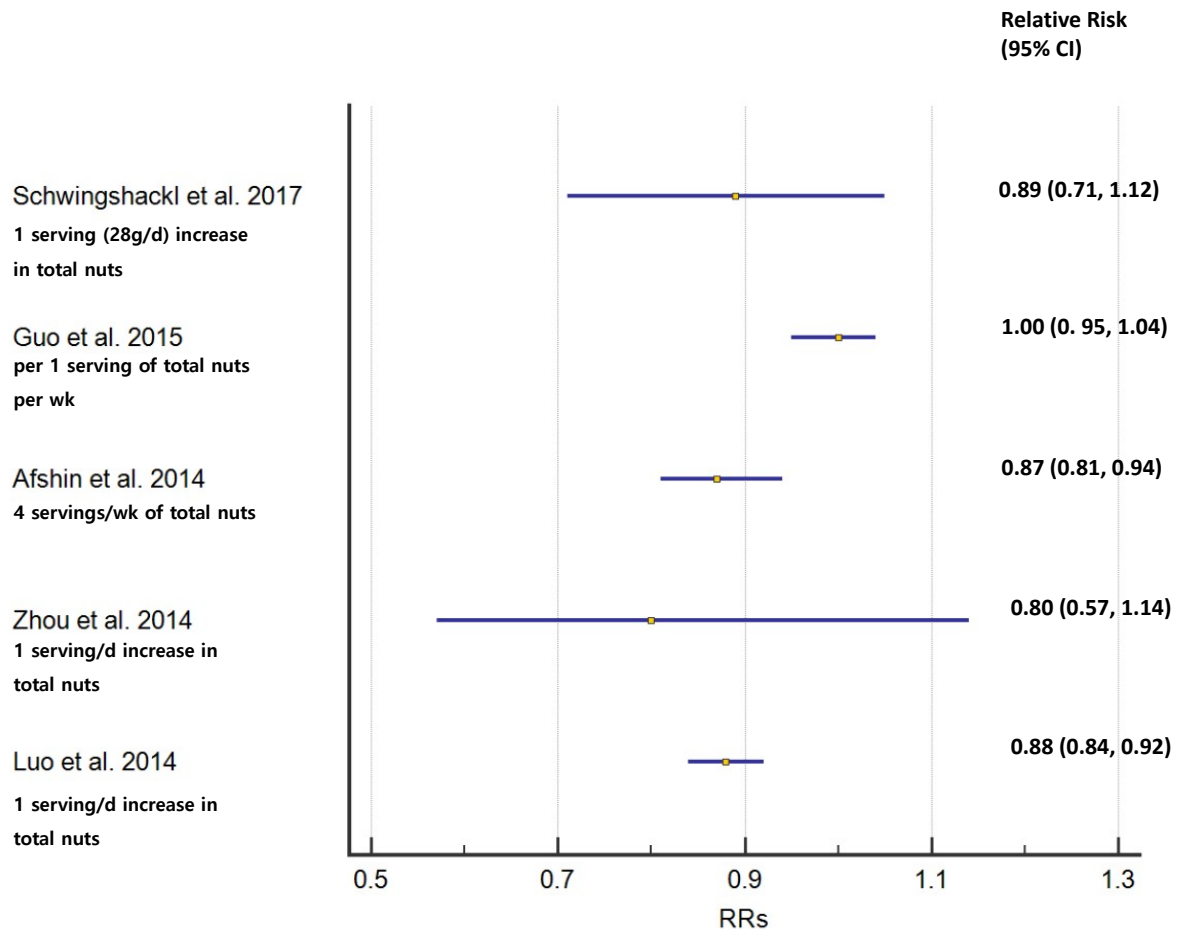

Supplementary Figure 13. Total nuts and total cardiovascular disease, high vs. low analysis

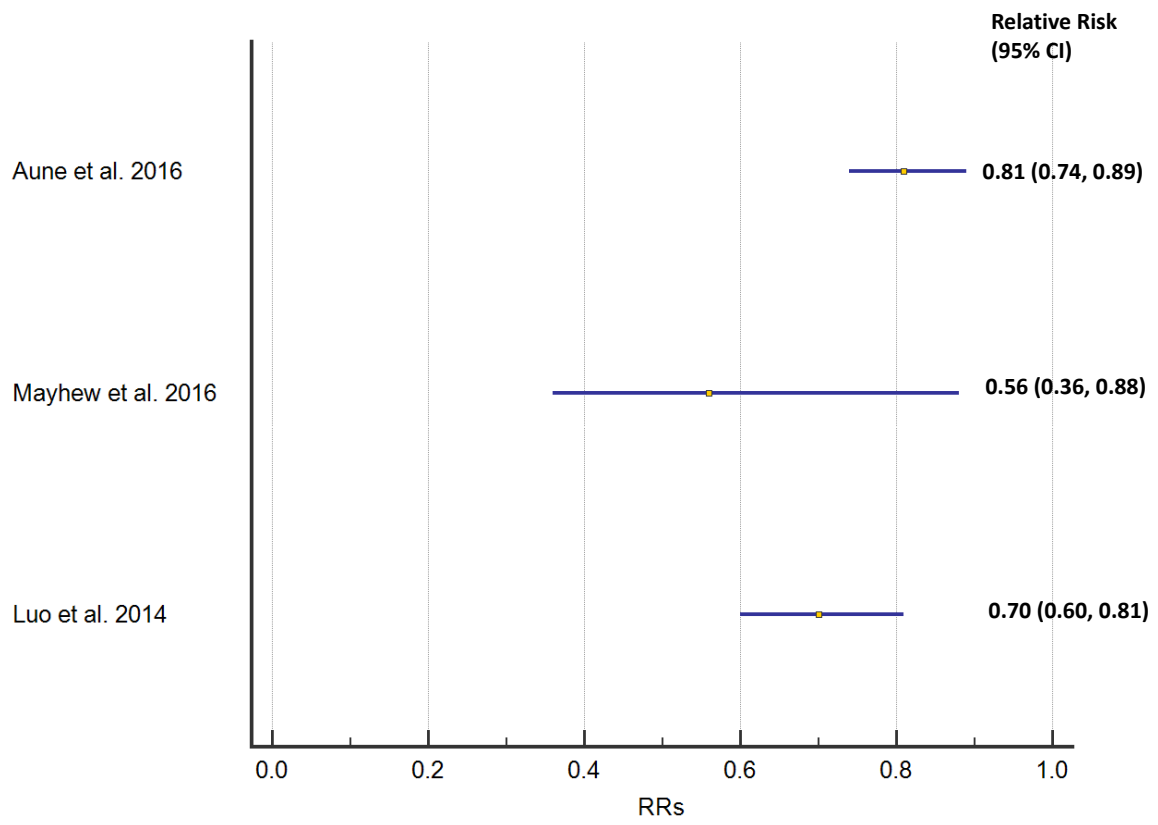

Supplementary Figure 14. Total nuts and total cardiovascular disease, dose-response analysis

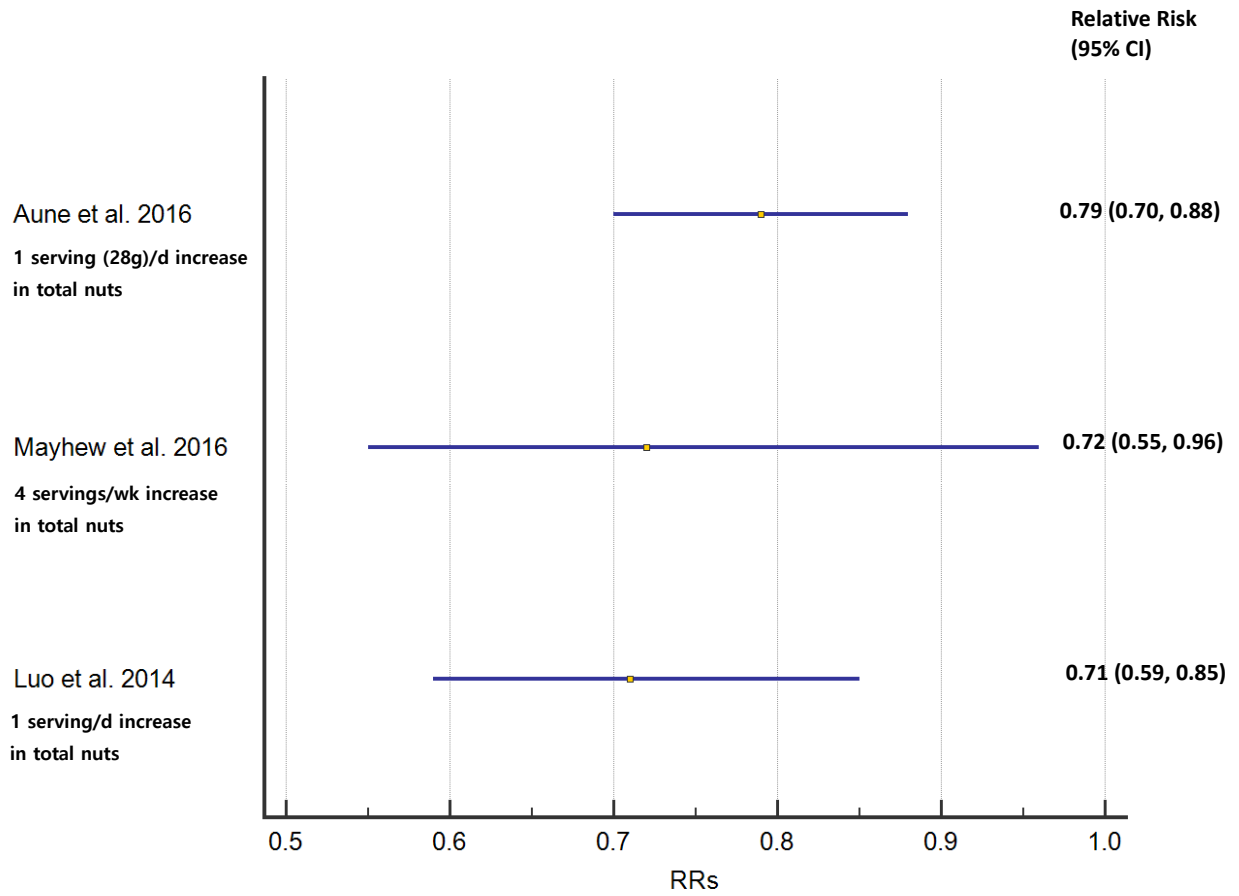

**Supplementary Figure 15. Total nuts and hypertension, high vs. low analysis**

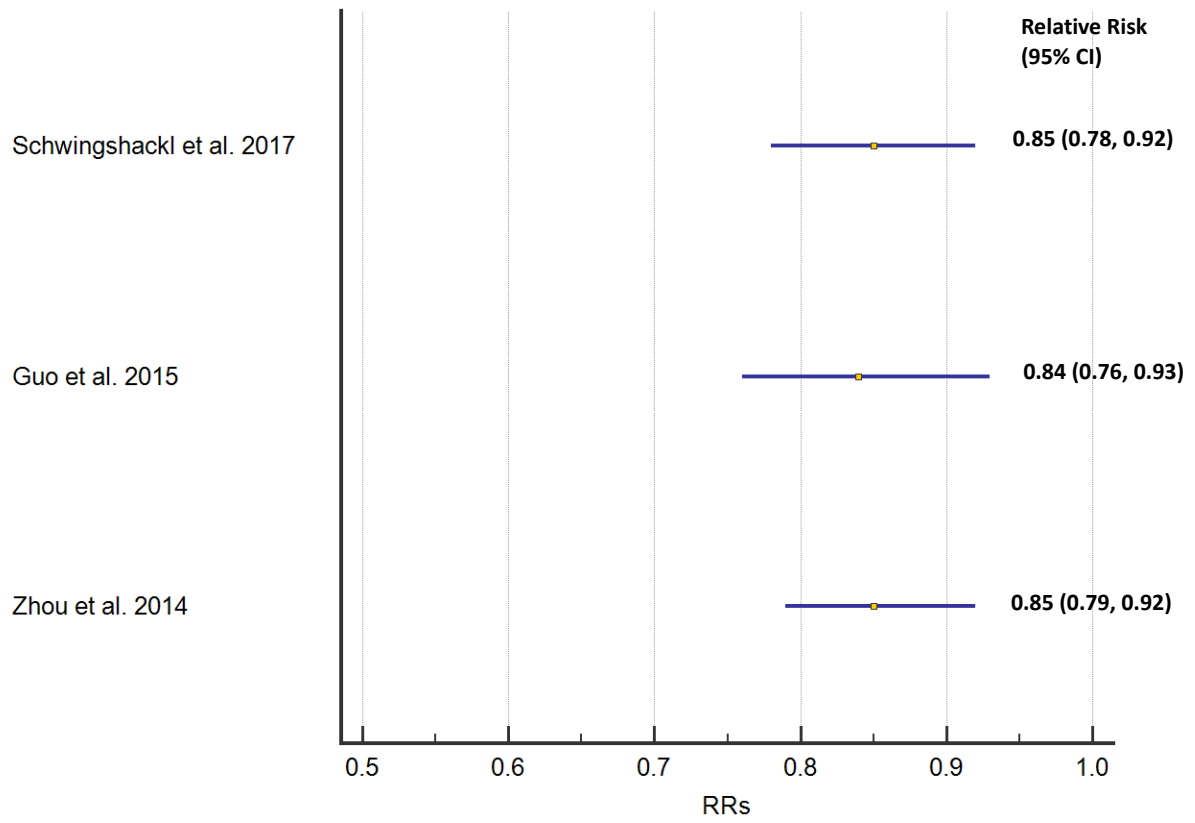

Supplementary Figure 16. Total nuts and hypertension, dose-response analysis

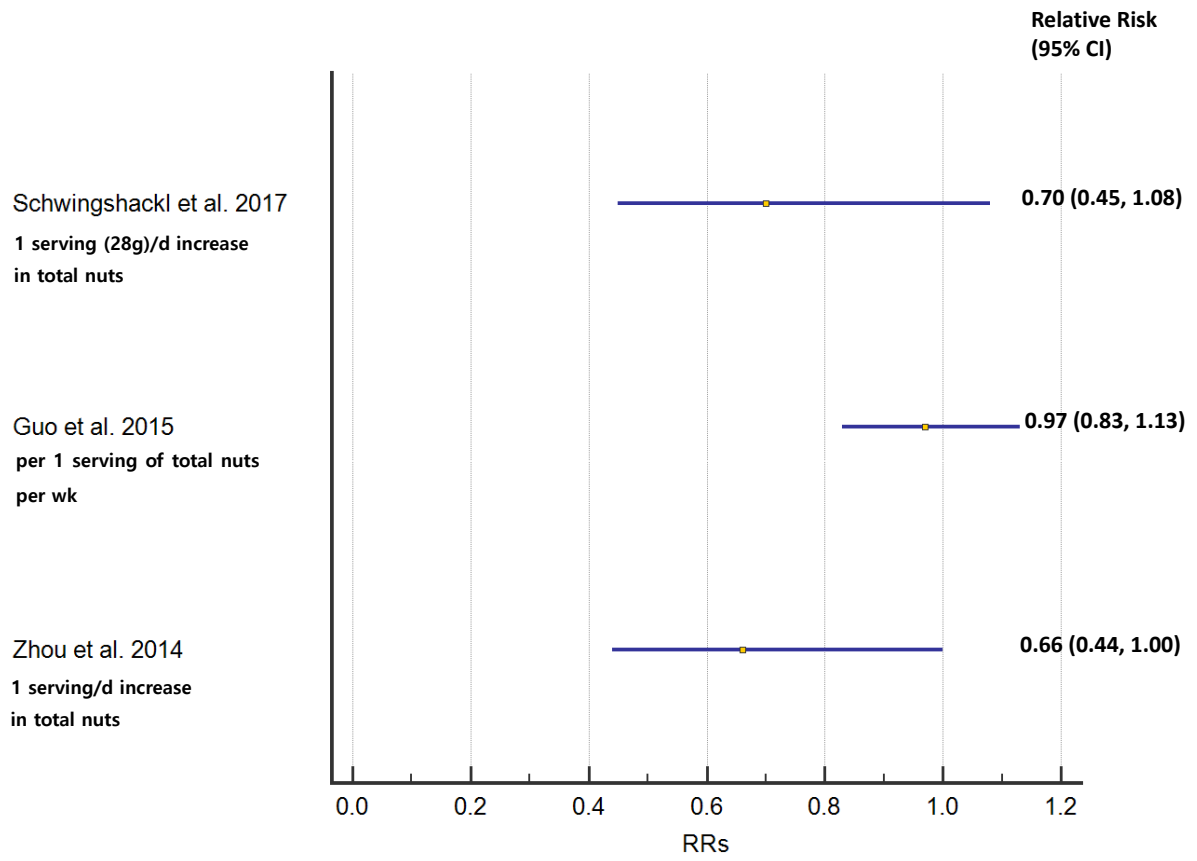



Supplementary Figure 17. Total nuts and total coronary heart disease, high vs. low analysis

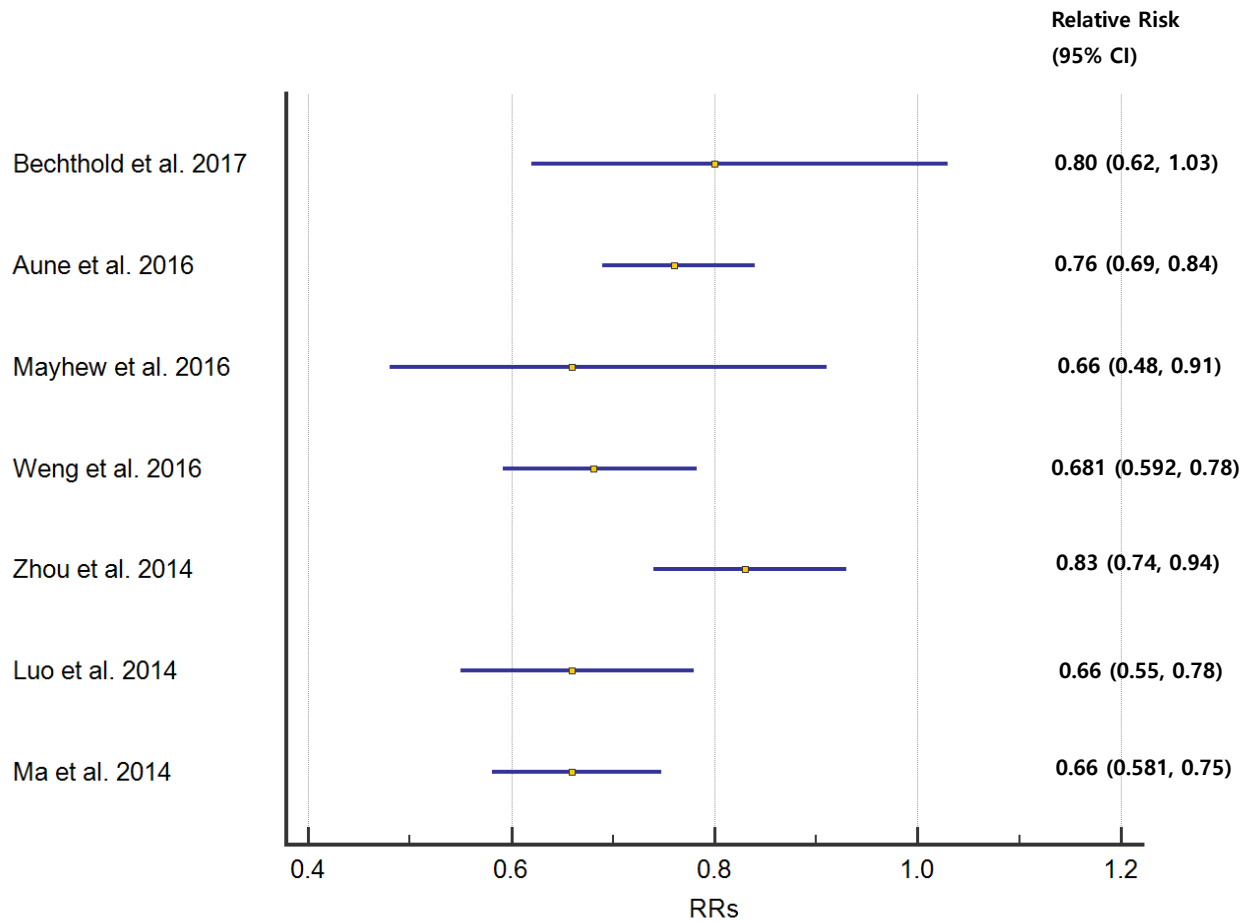

Supplementary Figure 18. Total nuts and total coronary heart disease, dose-response analysis

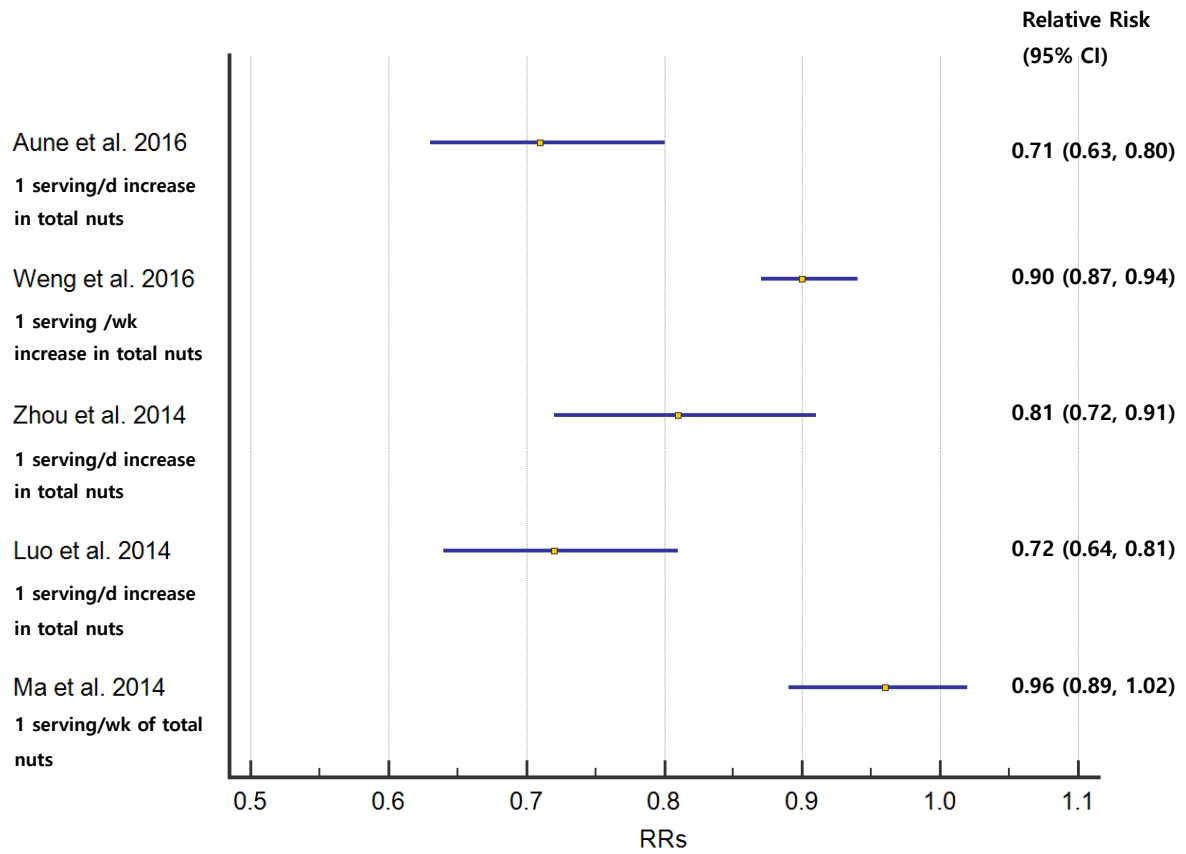

**Supplementary Figure 19. Total nuts and non-fatal/fatal coronary heart disease, dose-response analysis**

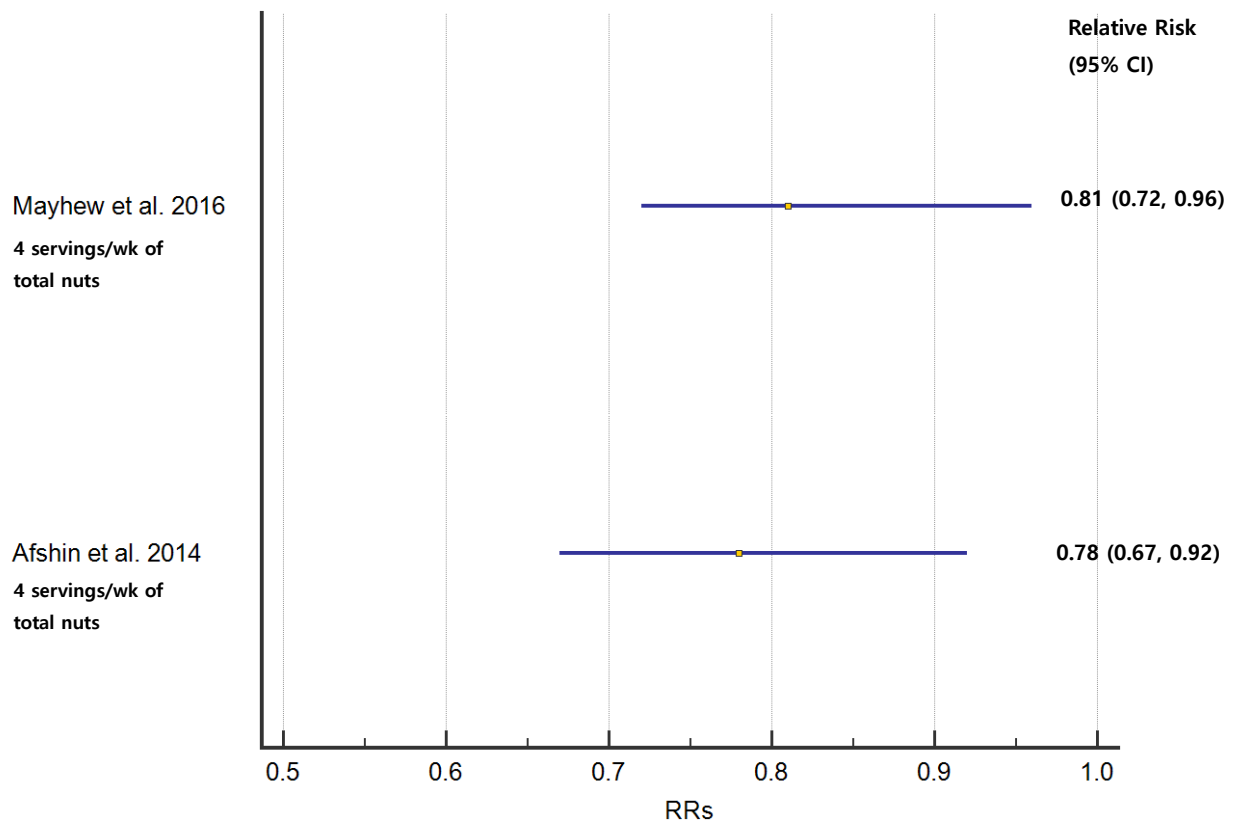

Supplementary Figure 20. Total nuts and total stroke, high vs. low analysis

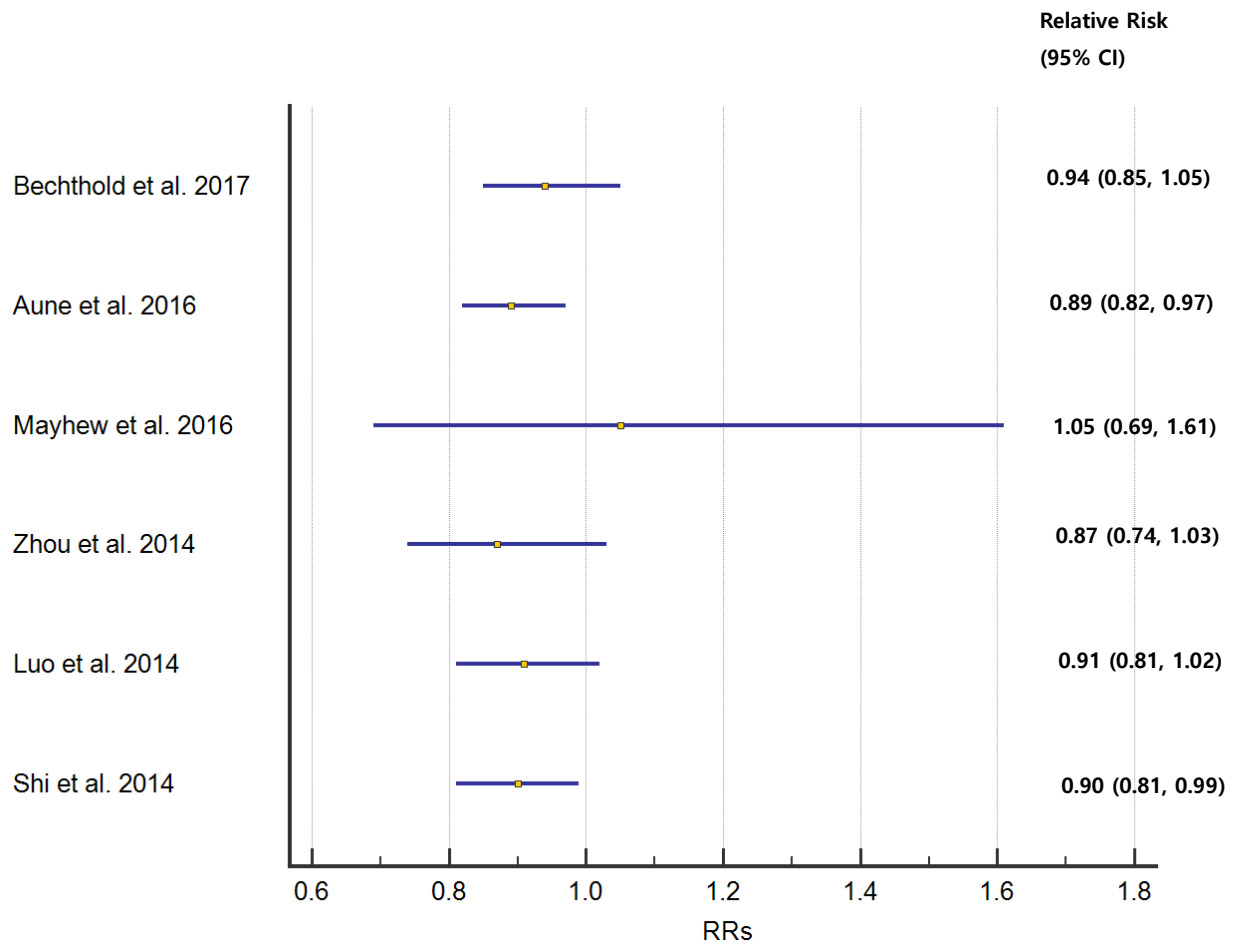

Supplementary Figure 21. Total nuts and total stroke, dose-response analysis

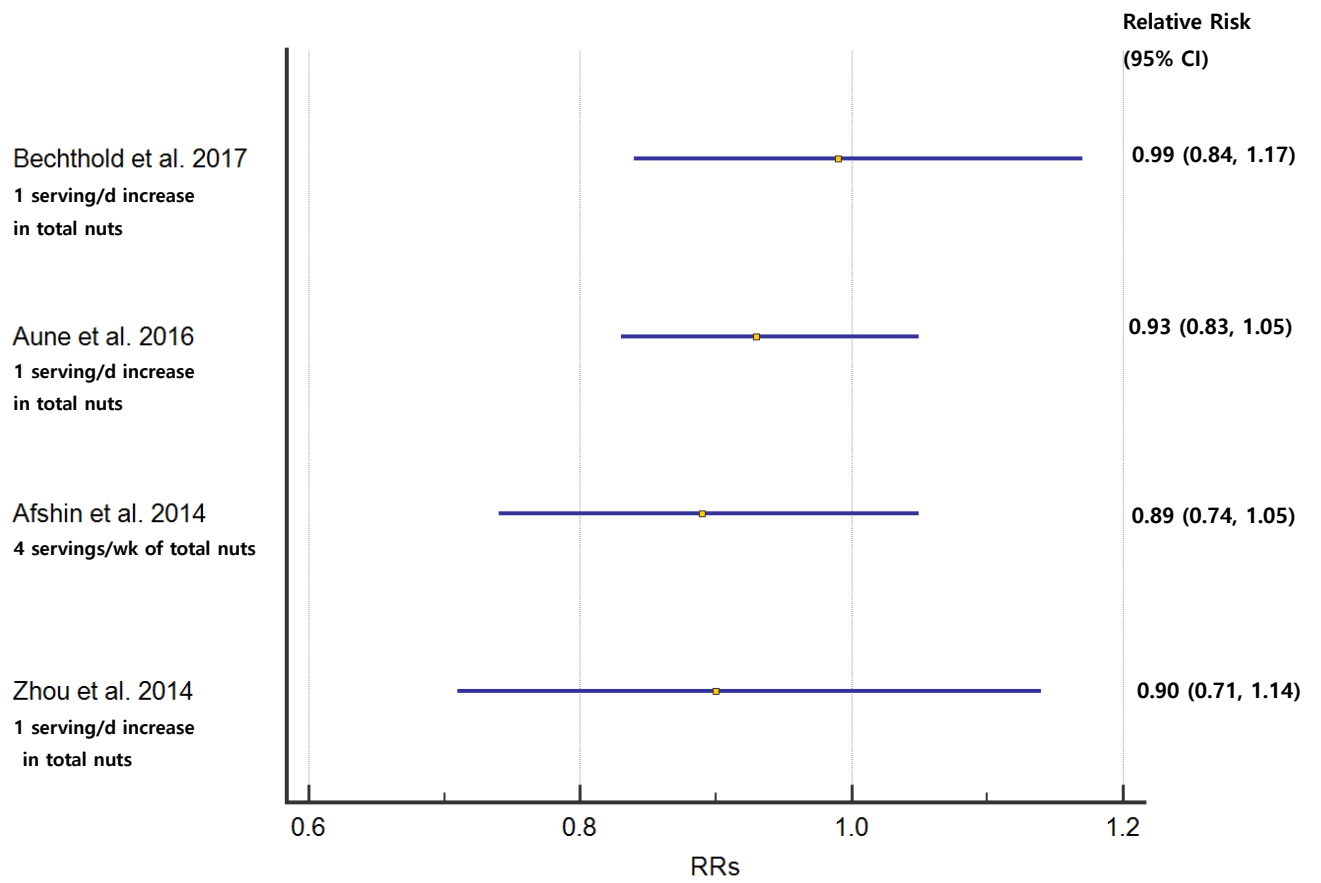

Supplementary Figure 22. Nuts and body weight

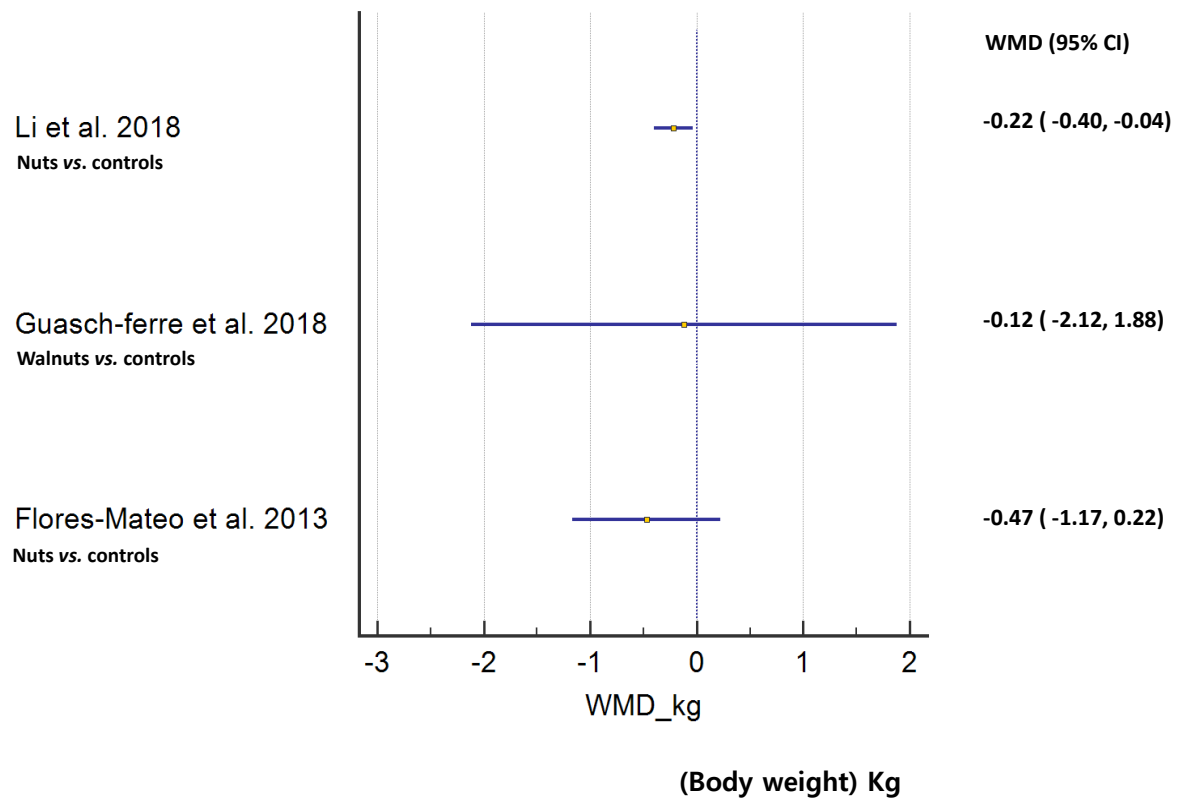

Supplementary Figure 23. Nuts and waist circumference

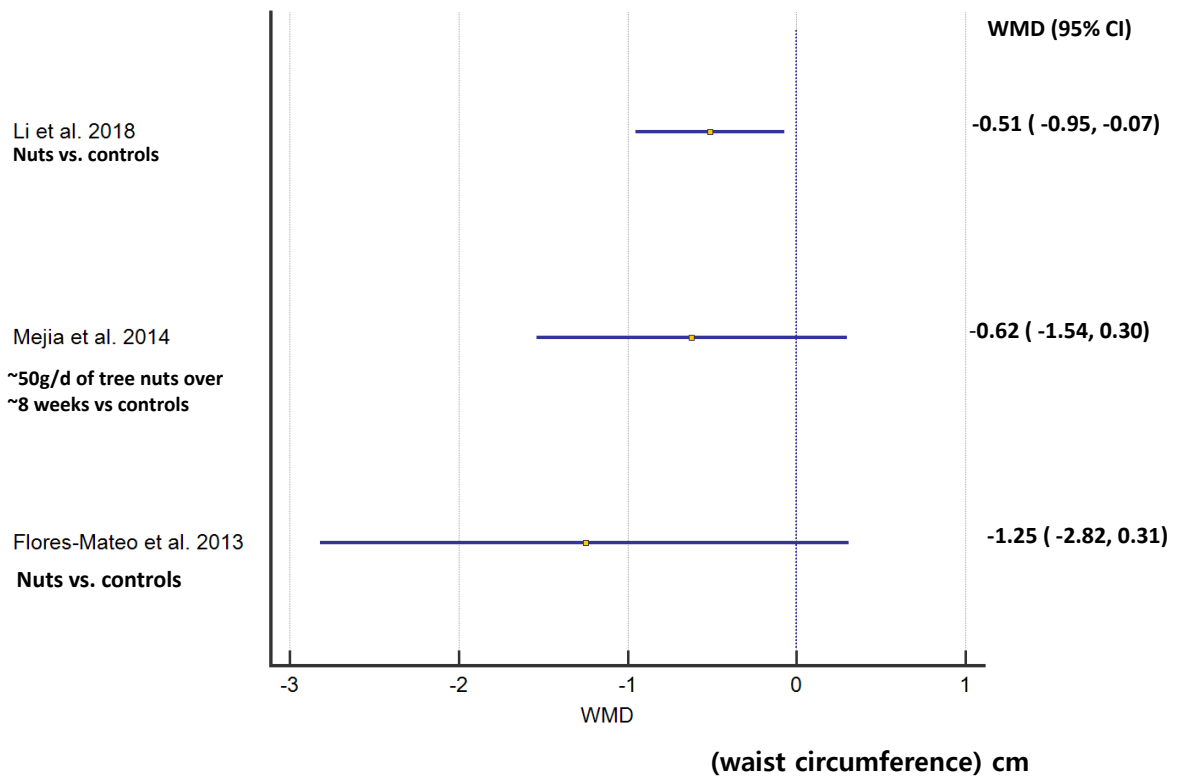

Supplementary Figure 24. Nuts and body mass index

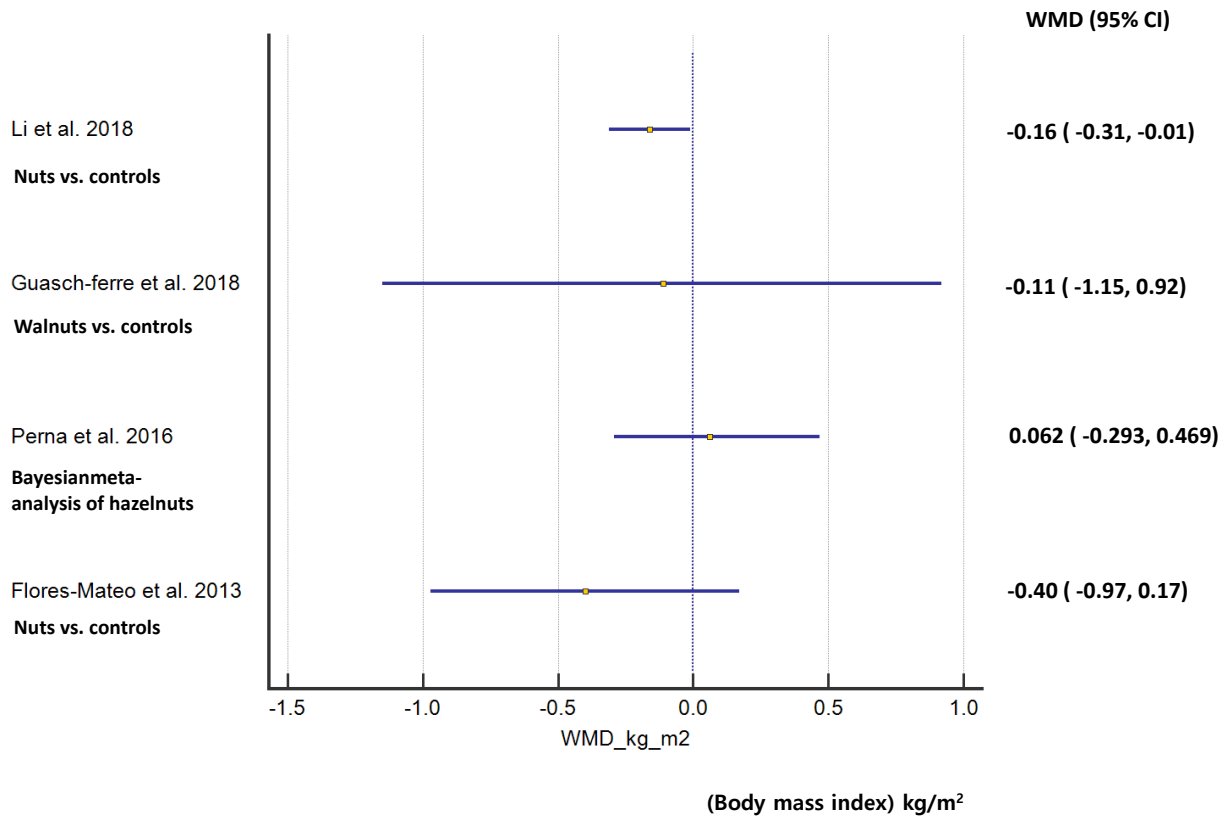



Supplementary Figure 25. Nuts and fasting blood glucose

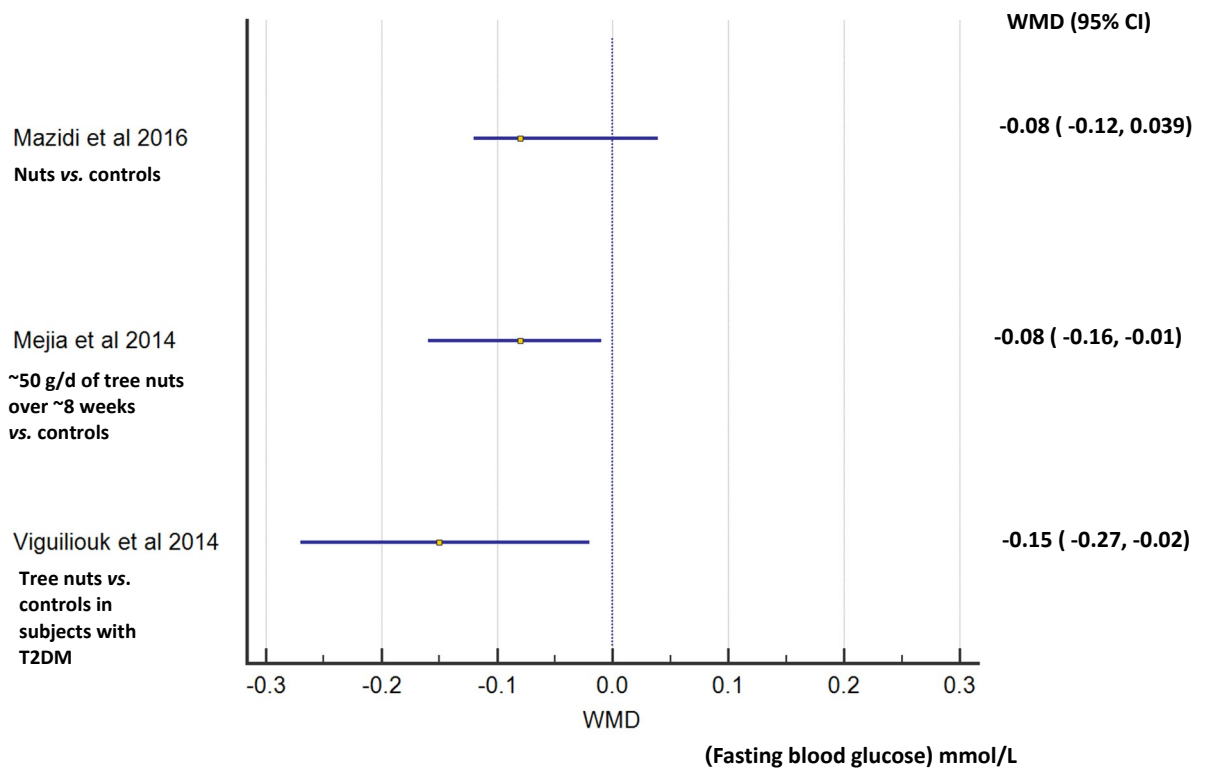

Supplementary Figure 26. Nuts and total cholesterol

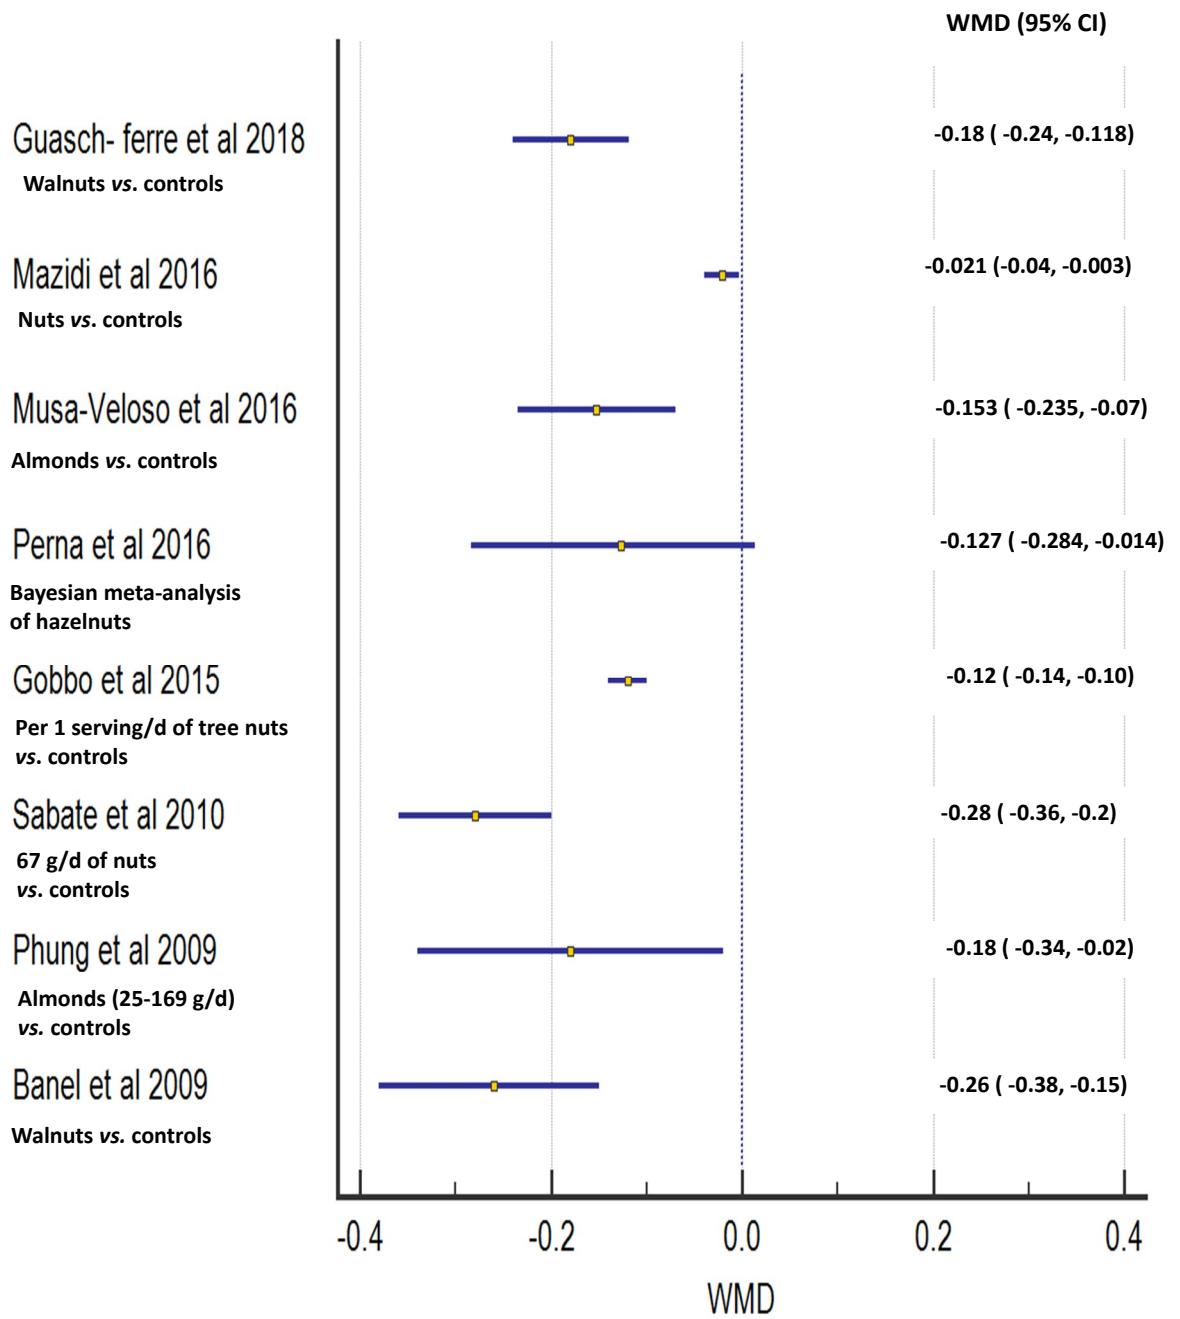

(Total cholesterol) mmol/L

Supplementary Figure 27. Nuts and low-density lipoprotein cholesterol

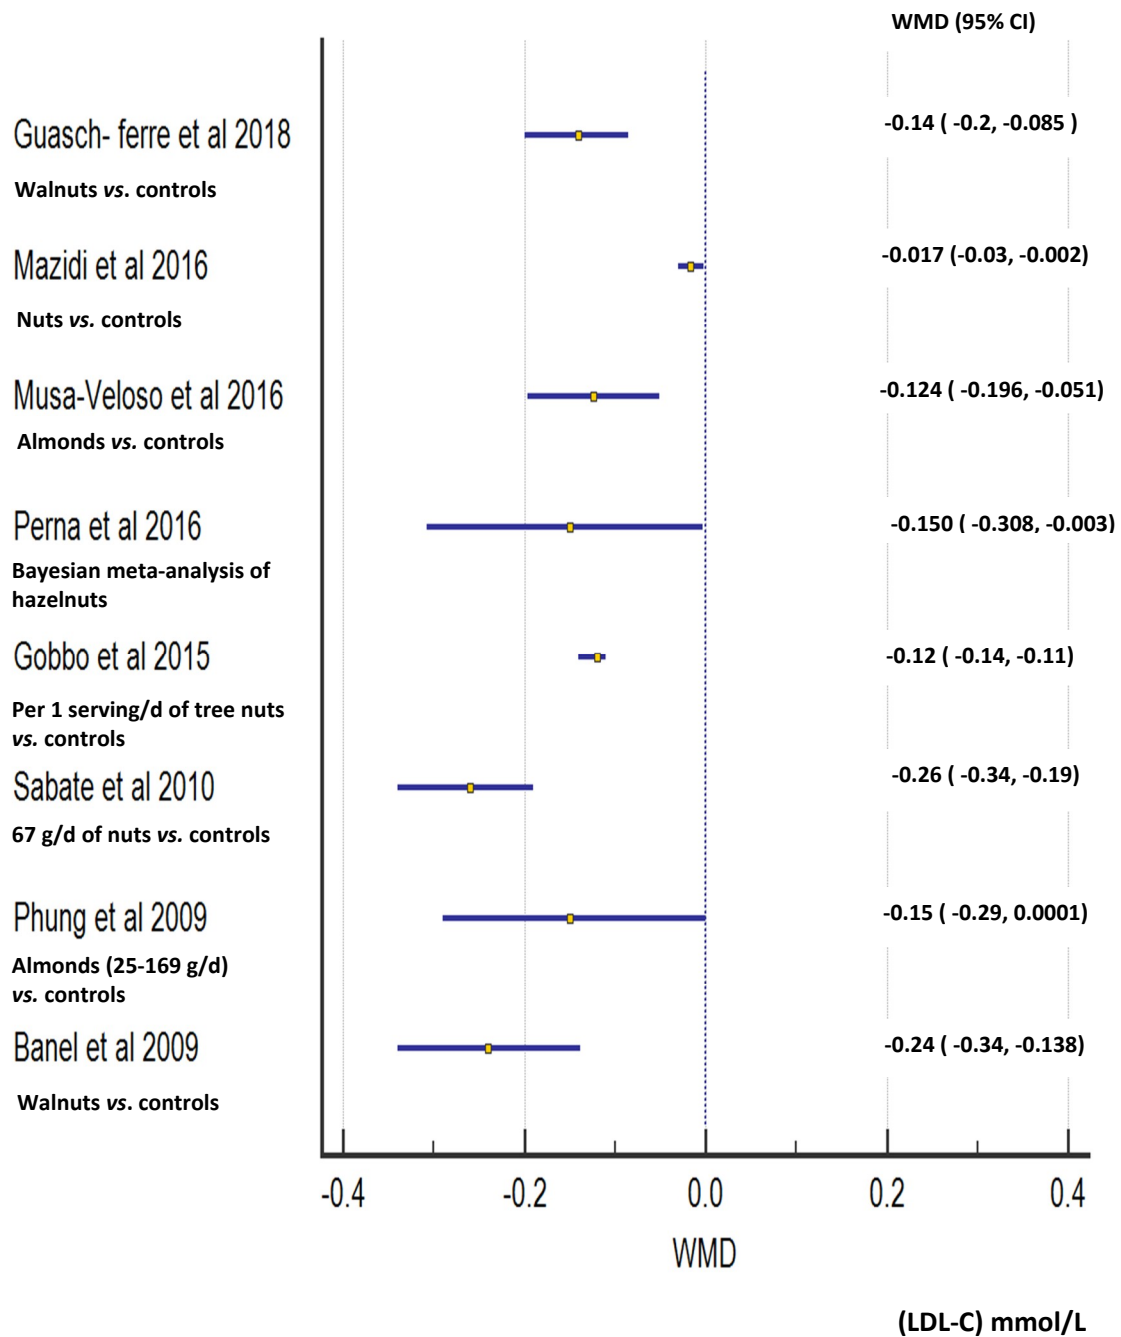

Supplementary Figure 28. Nuts and high-density lipoprotein cholesterol

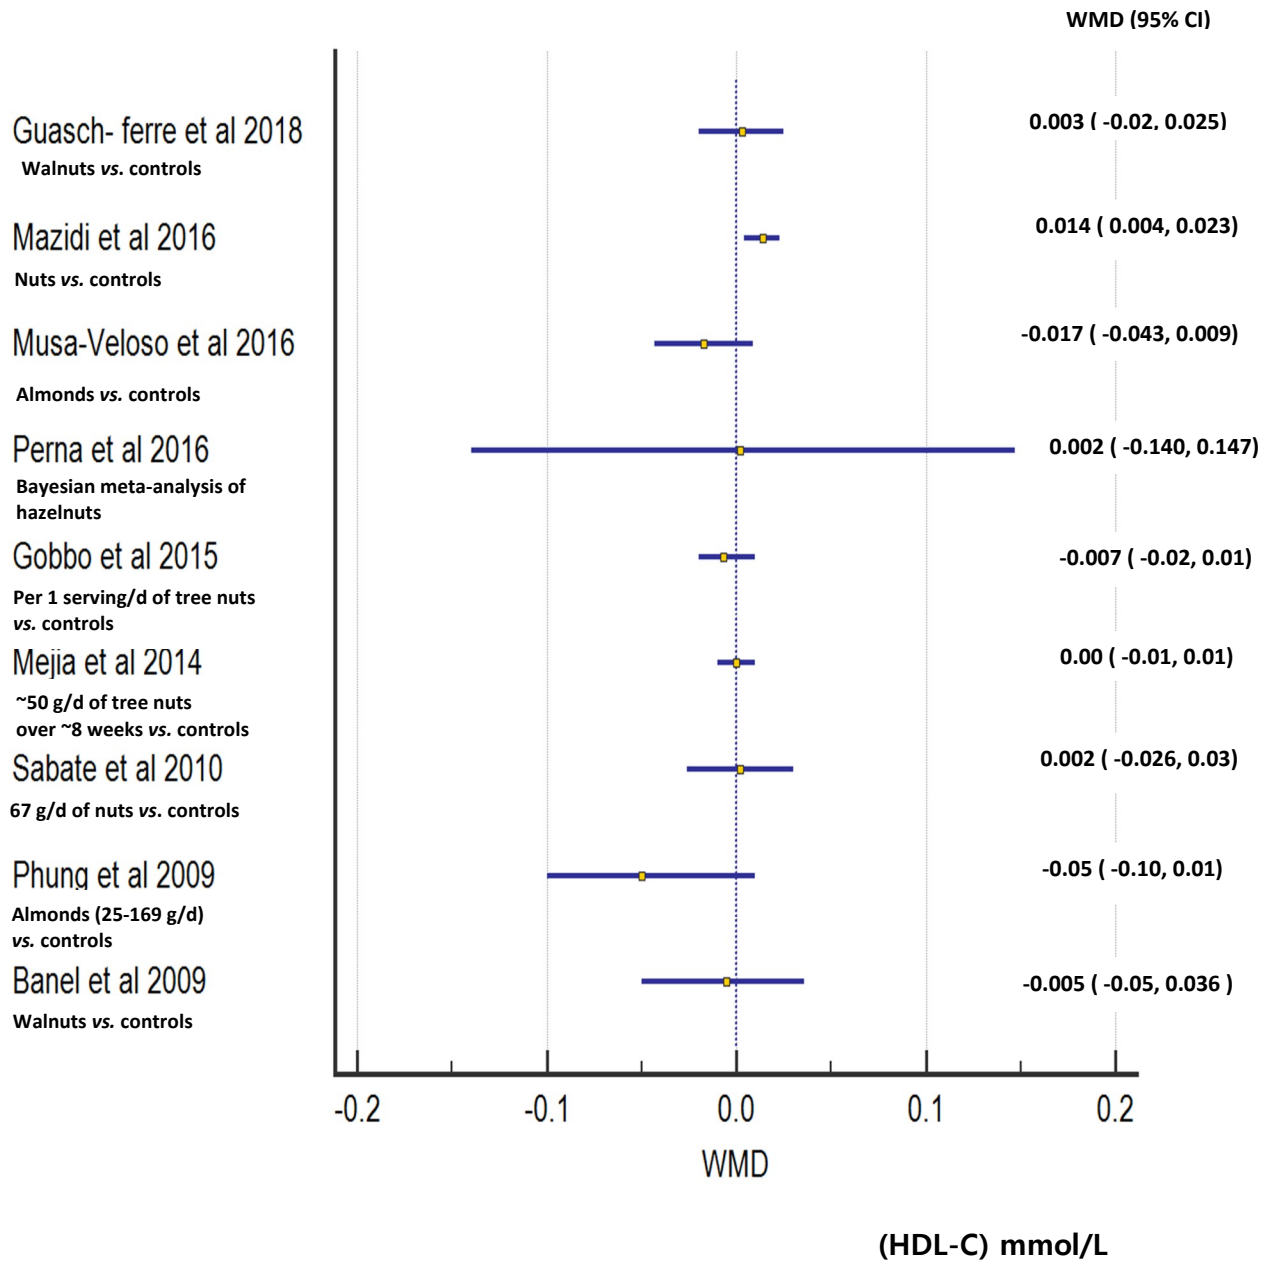

Supplementary Figure 29. Nuts and triglycerides

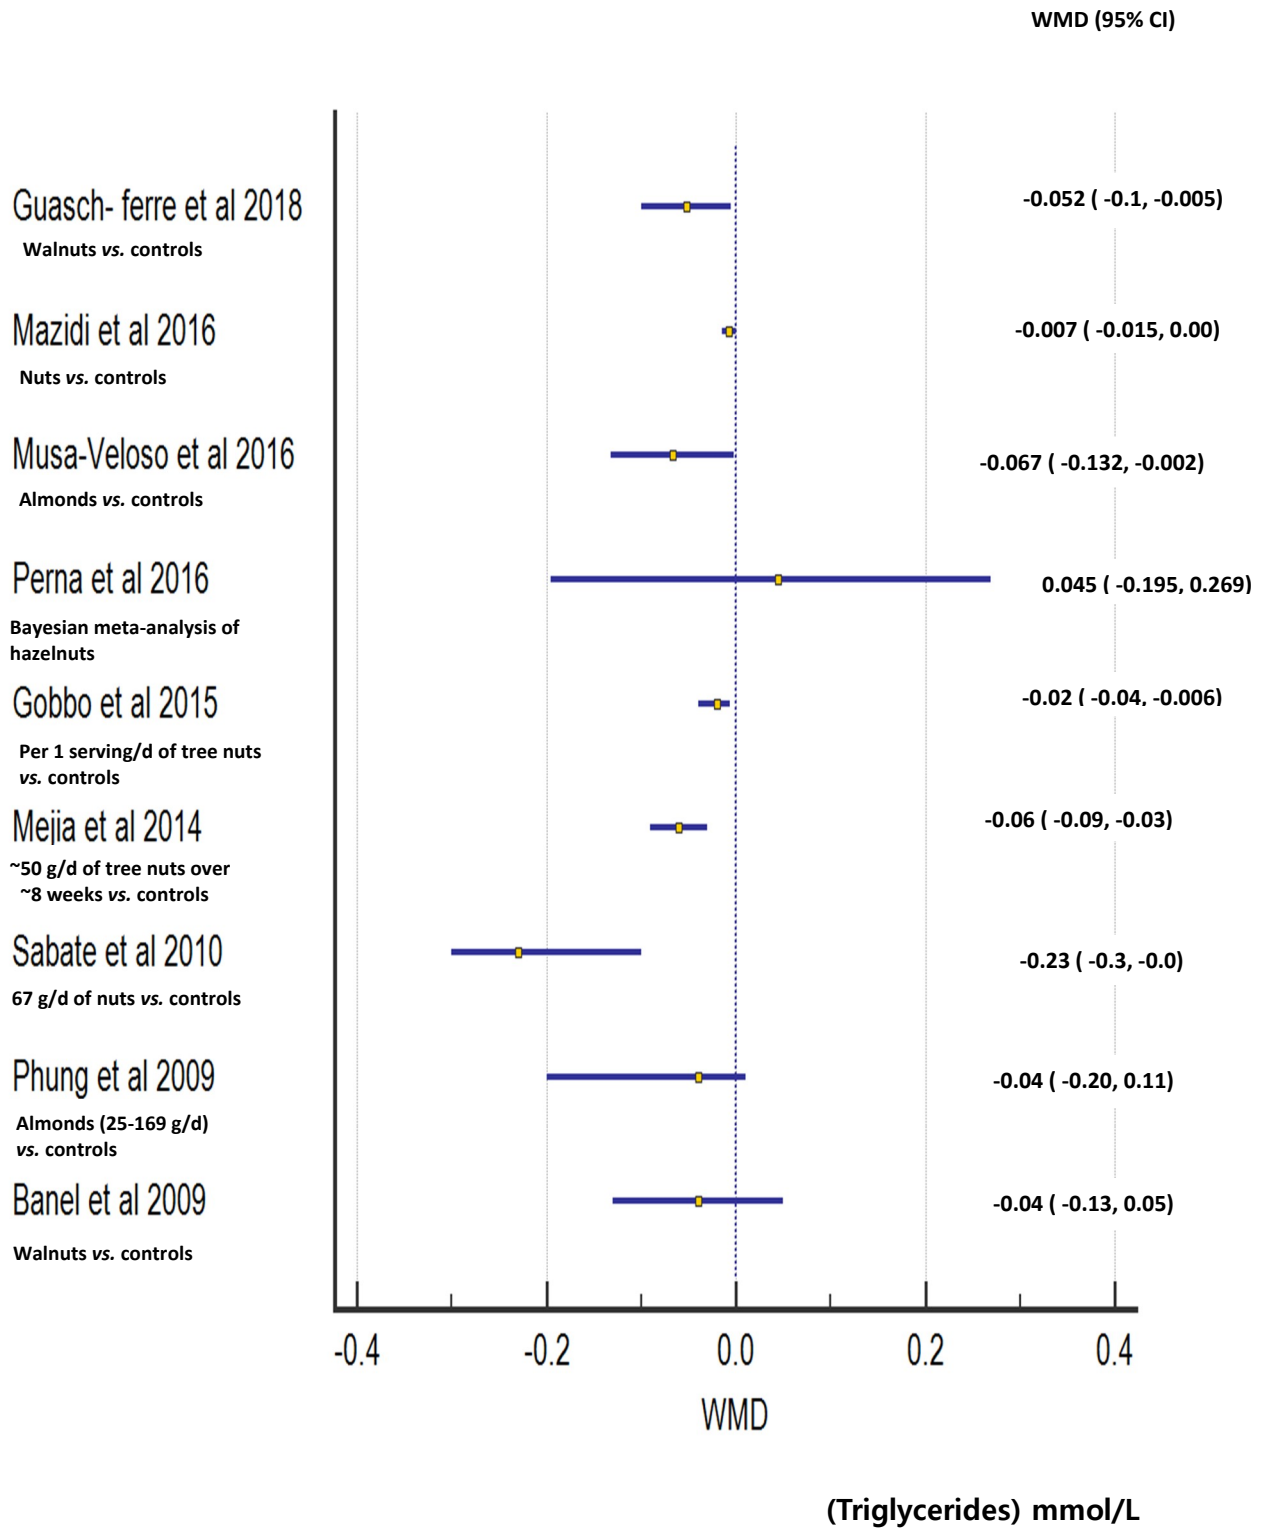

Supplementary Figure 30. Nuts and apolipoprotein A-1

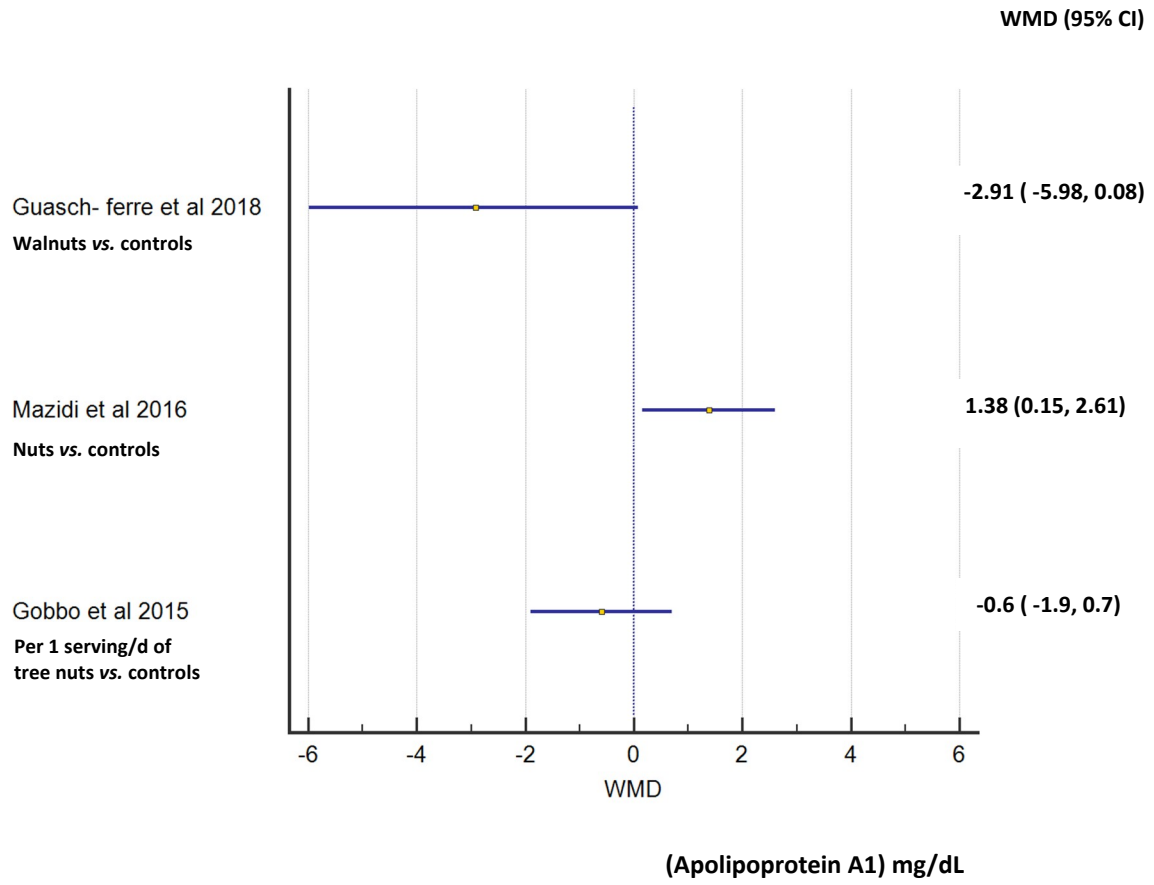

Supplementary Figure 31. Nuts and apolipoprotein B

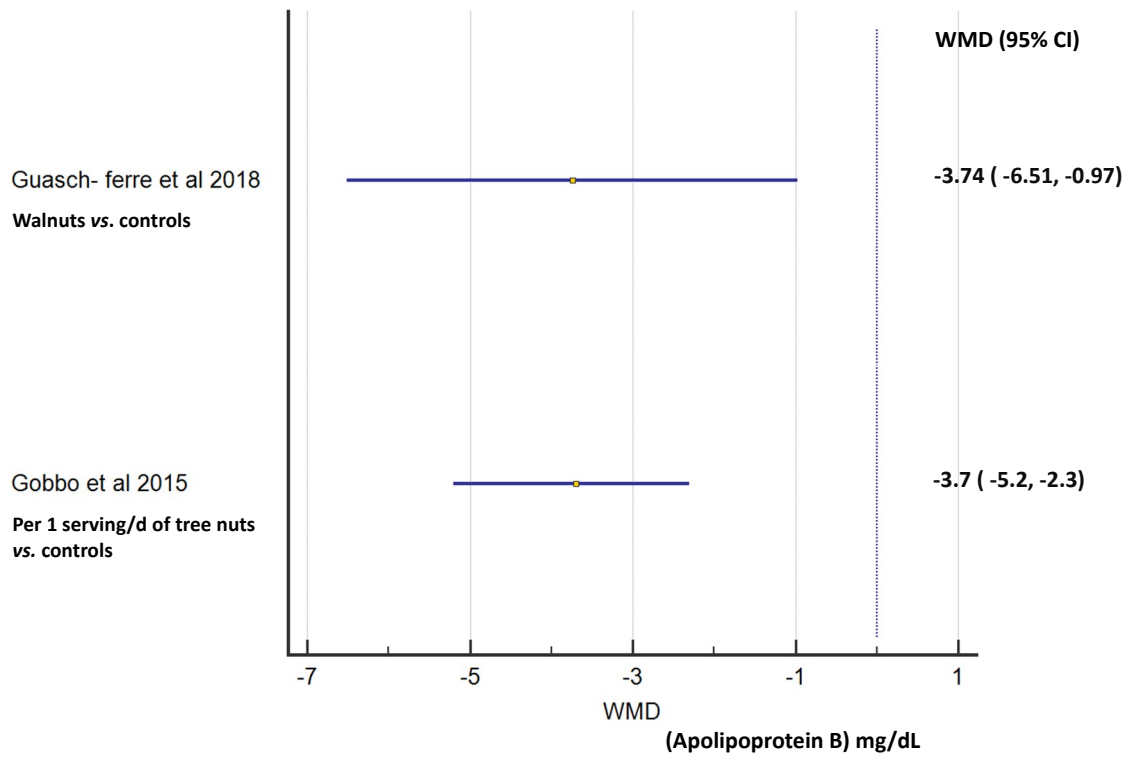

Supplementary Figure 32. Nuts and apolipoprotein B 100

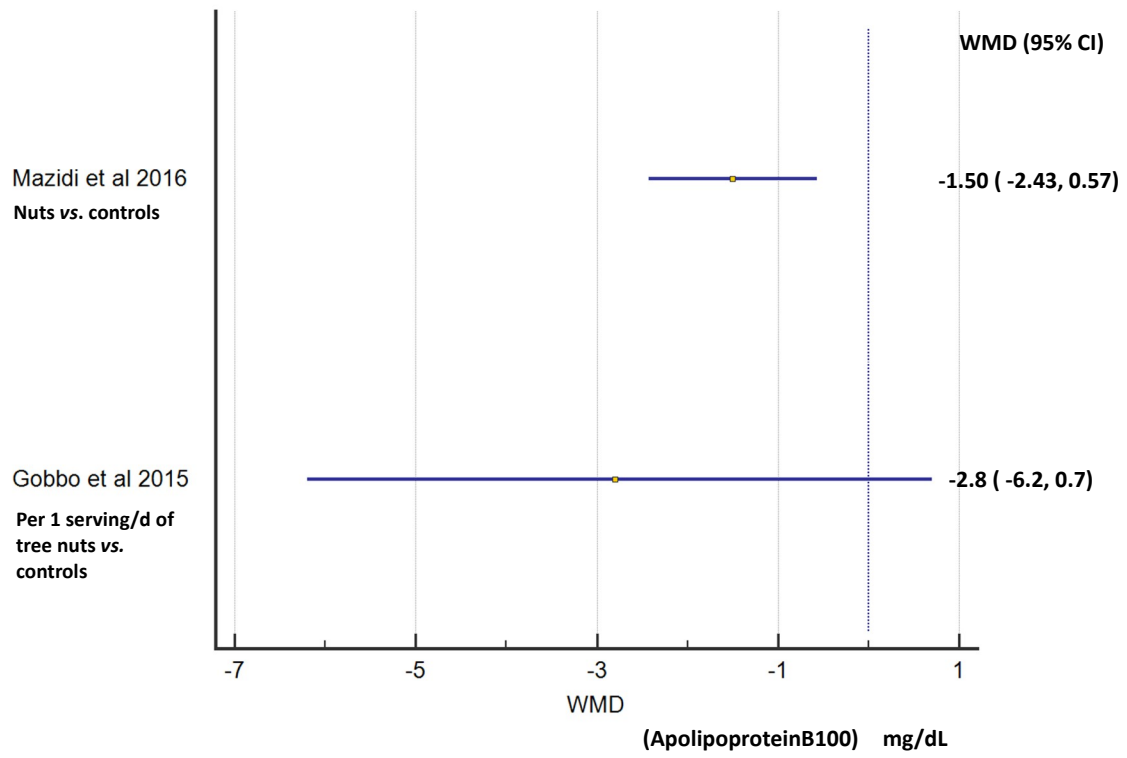



**Supplementary Figure 33. Nuts and systolic blood pressure**

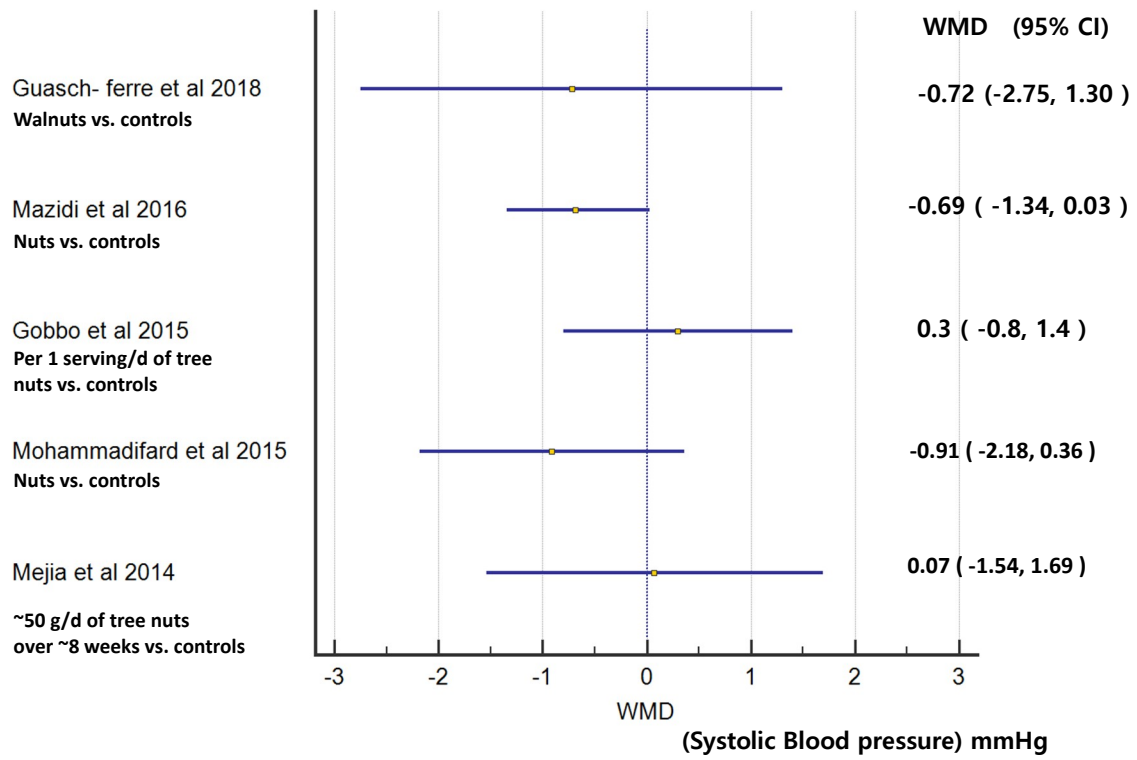

**Supplementary Figure 34. Nuts and diastolic blood pressure**

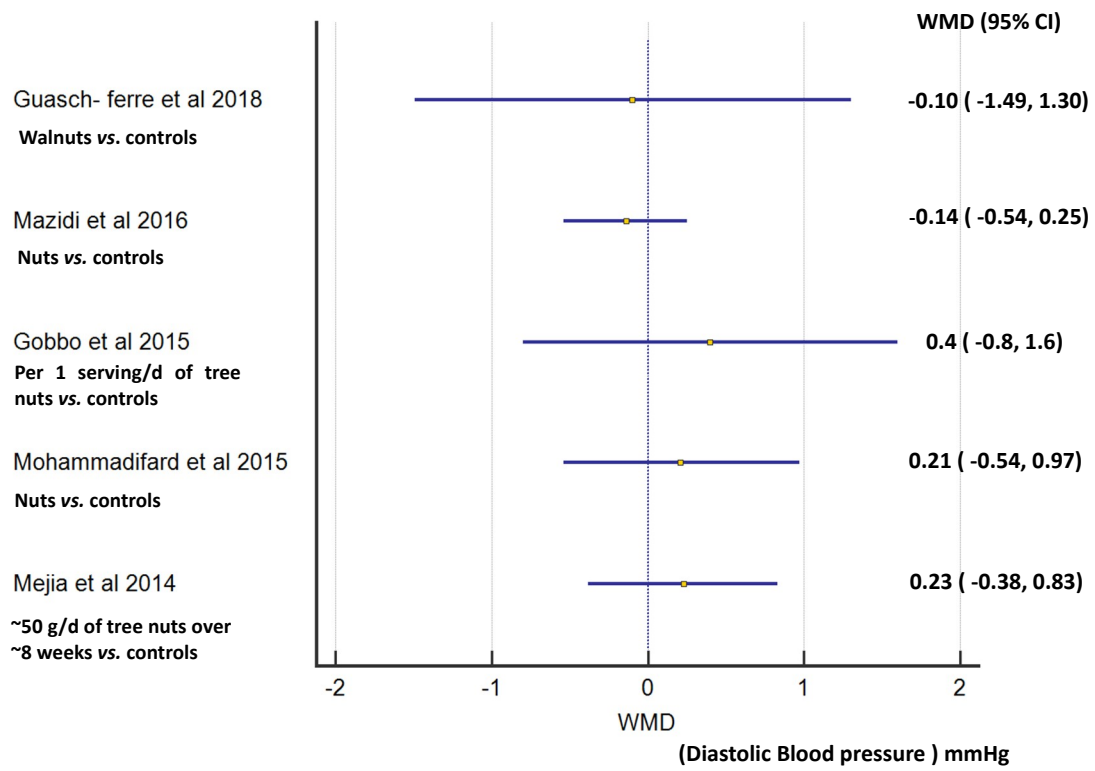

Supplementary Figure 35. Nuts and adiponectin

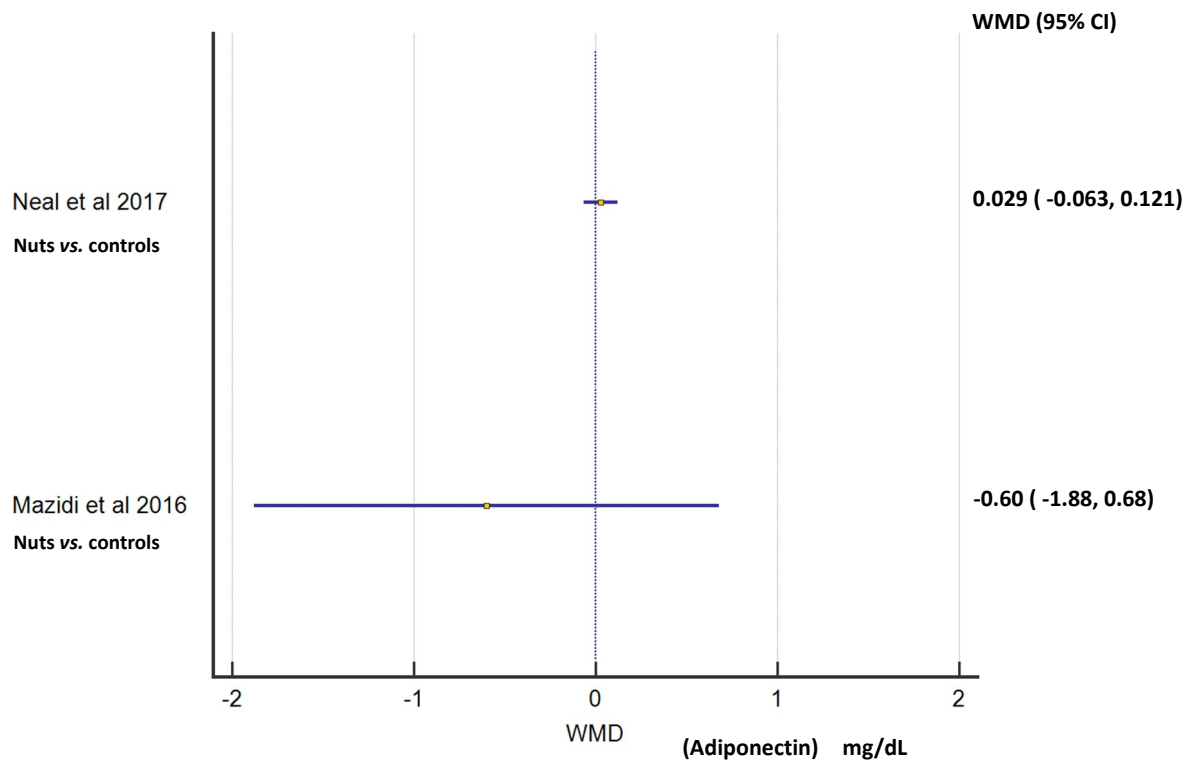

Supplementary Figure 36. Nuts and C-reactive protein (CRP)

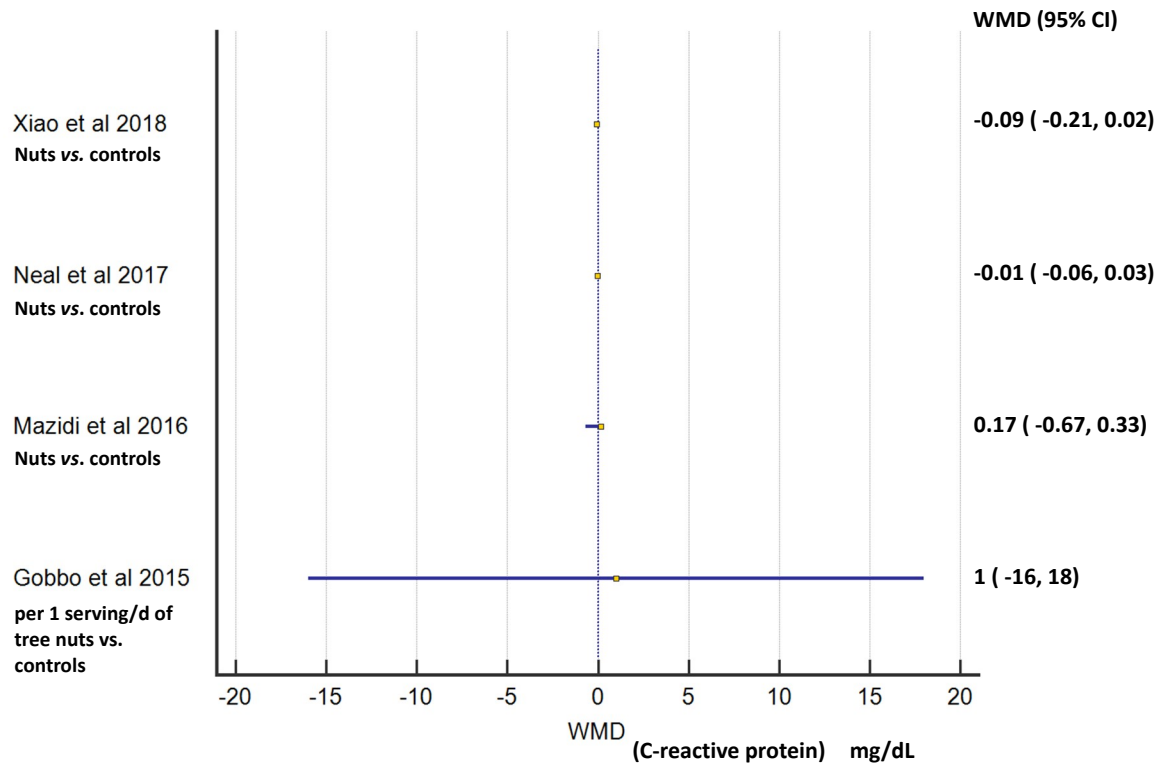

Supplementary Figure 37. Nuts and interleukin-6 (IL-6)

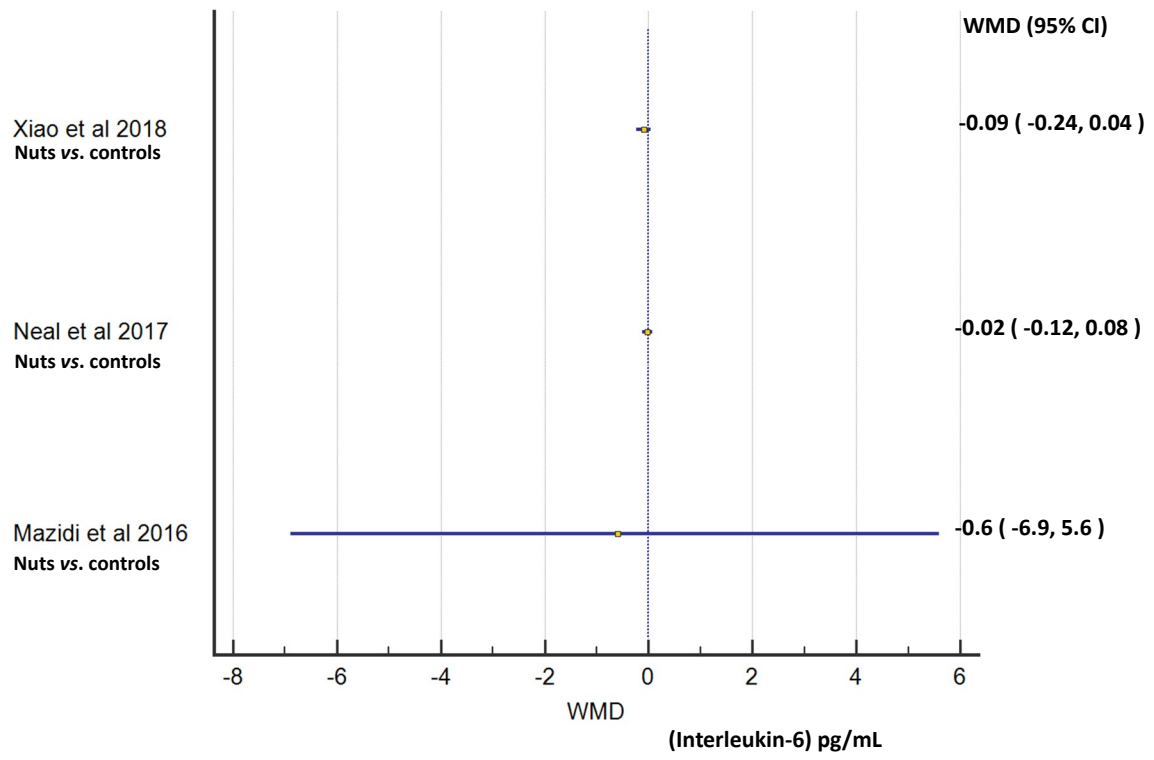

Supplementary Figure 38. Nuts and tumor necrosis factor-alpha (TNF- $\alpha$ )

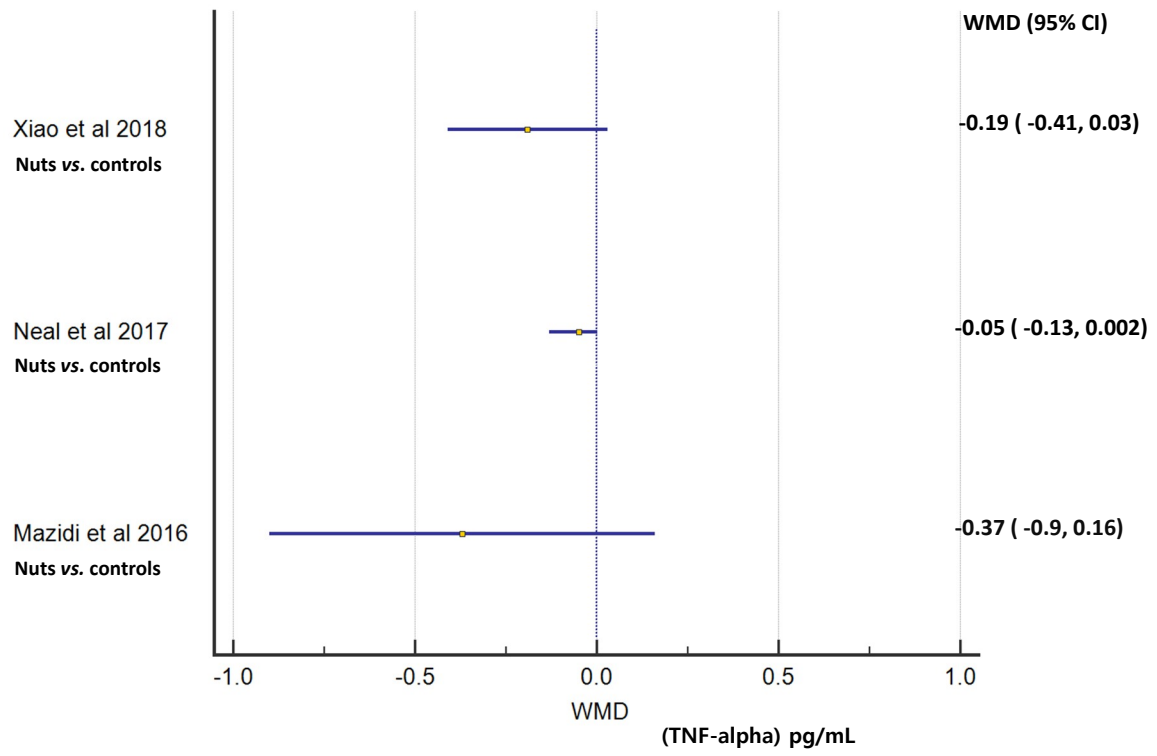

Supplementary Figure 39. Nuts and intracellular adhesion molecule-1 (ICAM-1)

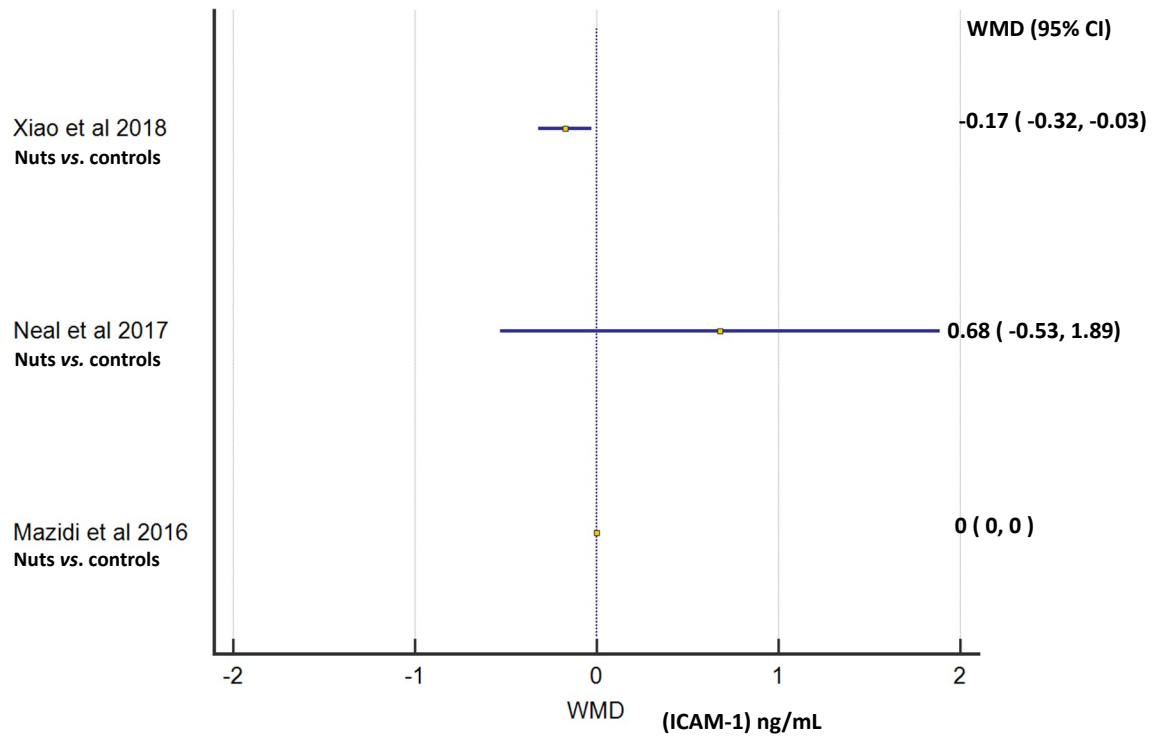

Supplementary Figure 40. Nuts and vascular cell adhesion molecule-1 (VCAM-1)

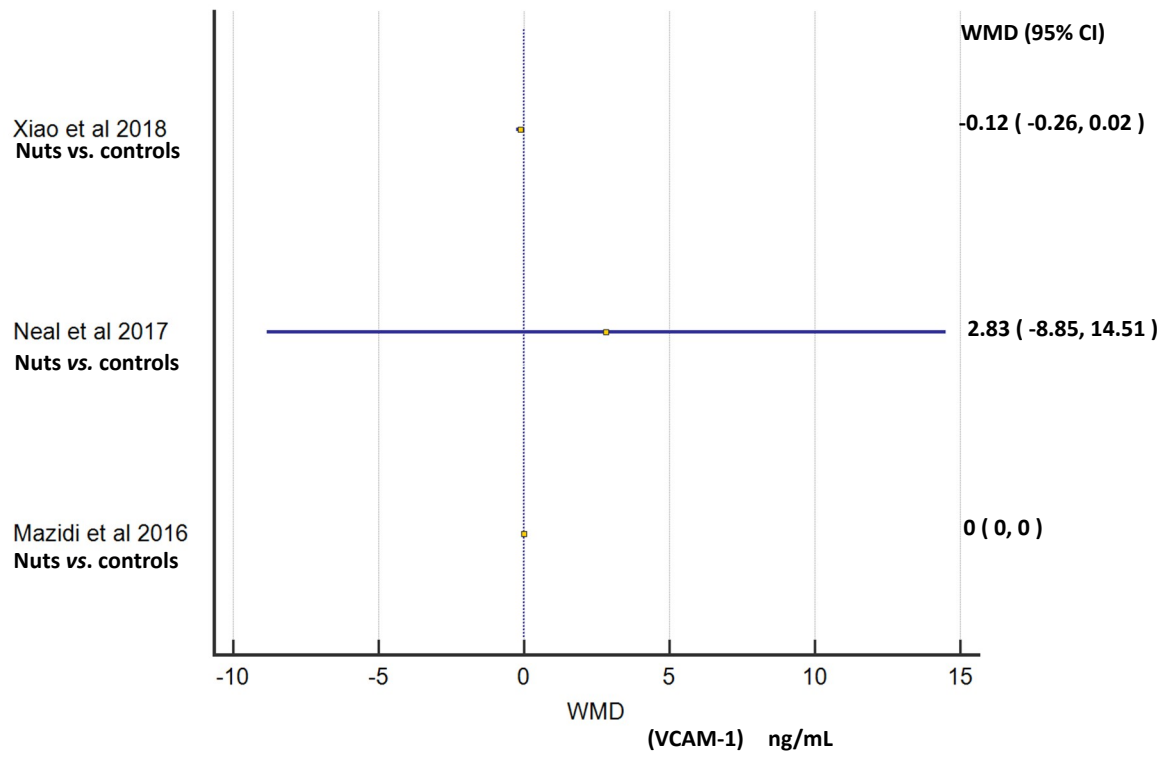



Supplementary Figure 41. Nuts and E-selectin

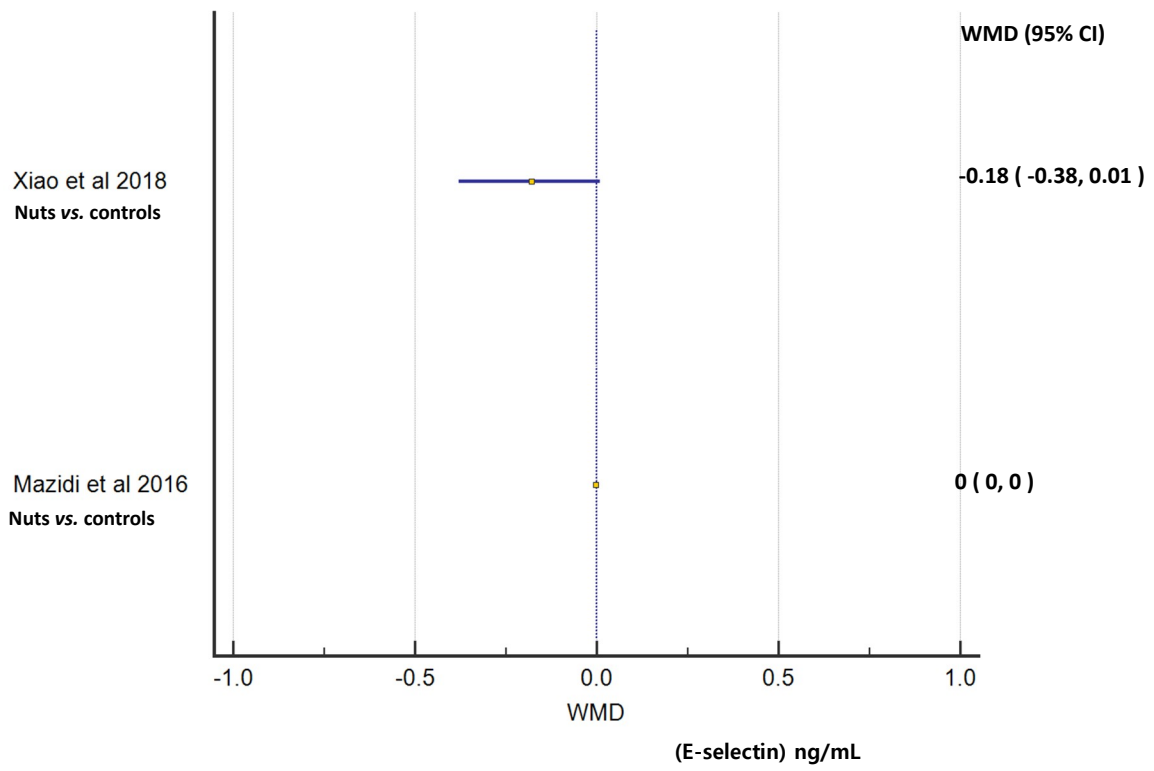

Supplementary Figure 42. Nuts and flow-mediated dilation (FMD)

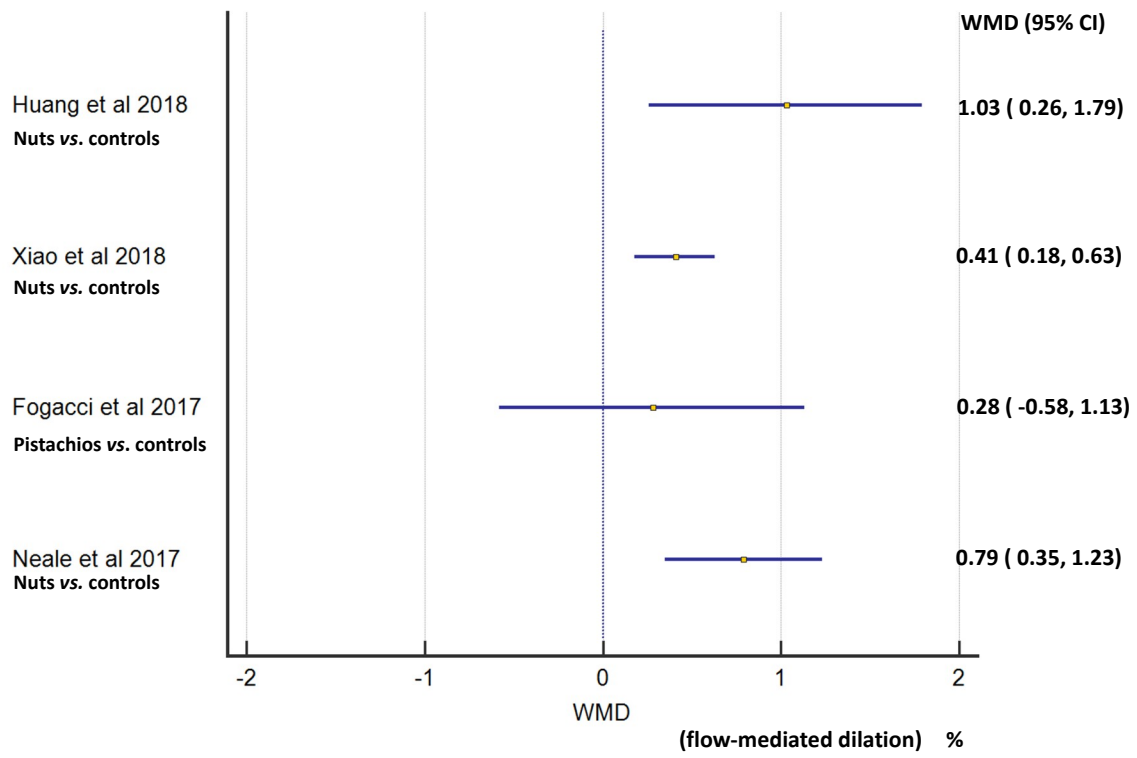

Supplement: s1 [file s1]
